# Supplementary material
Source: Royal Society of Chemistry journal article supplement (doi:10.1039/d5ce00495k)
Supplement: d5ce00495k1.pdf [file d5ce00495k1.pdf]

## ***SUPPLEMENTARY INFORMATION***

# **Subtle symmetry breaking in averievite-type compounds, $(MX)Cu_5O_2(VO_4)_2$ ( $MX = CsBr, CsI, RbBr, RbI$ and $KI$ )**

*Ilya V. Korniyakov,<sup>\*ab</sup> Alexey A. Kalinichev,<sup>a</sup> Marina V. Likholetova,<sup>a</sup> and Sergey V. Krivovichev*  
*ab*

<sup>a</sup> St. Petersburg State University, University Emb. 7/9, 199034, St. Petersburg, Russia. E-mail: i.korniyakov@spbu.ru;

<sup>b</sup> Nanomaterials Research Centre, Kola Science Centre, Russian Academy of Sciences, Fersmana 14, 184209, Apatity, Russia.

## Synthesis and X-ray diffraction analysis of (CsI)Cu<sub>5</sub>O<sub>2</sub>(PO<sub>4</sub>)<sub>2</sub>

Single crystal of (CsI)Cu<sub>5</sub>O<sub>2</sub>(PO<sub>4</sub>)<sub>2</sub> were obtained by means solid state reactions in low vacuum following the same method, utilized by Korniyakov *et al.* for synthesis of other phosphates of averievite family.<sup>1</sup> There are two significant distinctions: the use of CsI reagent (CsI, 99%, Sigma-Aldrich) and the maximal temperature of the synthesis which did not exceed 600 °C.

Single crystals of the (CsI)Cu<sub>5</sub>O<sub>2</sub>(PO<sub>4</sub>)<sub>2</sub> compound were investigated by single-crystal X-ray diffraction. The measurements were performed using a Rigaku XtaLAB Synergy-S diffractometer equipped with a monochromatic microfocus MoK $\alpha$  source (PhotonJet-S,  $\lambda = 0.71073$  Å, 50 kV, 1.0 mA) and a HyPix-6000HE hybrid photon counting detector at 300 and 100 K.

CrysAlisPro software was used for the integration and correction of diffraction data for polarization, background and Lorentz effects, a numerical absorption correction based on Gaussian integration over a multifaceted crystal model, and an empirical absorption correction based on spherical harmonics implemented in the SCALE3 ABSPACK algorithm.<sup>2</sup> The unit cell parameters were refined using a least-squares technique. The structure was solved by a dual-space algorithm and refined using SHELX programs,<sup>3,4</sup> which were incorporated in the *OLEX2* program package.<sup>5</sup>

### References

1. I. V. Korniyakov, V. V. Vladimirova, O. I. Siidra and S. V. Krivovichev, *Molecules*, 2021, **26**, 1833.
2. *CrysAlis Pro, Version 1.171.42.102a*, Rigaku Oxford Diffraction, 2023.
3. G. M. Sheldrick, *Acta Crystallogr., Sect. A: Found. Adv.*, 2015, **71**, 3–8.
4. G. M. Sheldrick, *Acta Crystallogr., Sect. C: Struct. Chem.*, 2015, **71**, 3–8.
5. O. V. Dolomanov, L. J. Bourhis, R. J. Gildea, J. A. K. Howard and H. Pushmann, *J. Appl. Crystallogr.*, 2009, **42**, 339–341.

**Table S1.** Selected unit-cell, data collection, and refinement parameters for averievite-type compounds.

| T, K | Formula                                                            | Space Group | $a$ , Å    | $c$ , Å   | $V$ , Å <sup>3</sup> | Reflections collected | Unique reflections in total | $\sin\theta/\lambda$ , Å <sup>-1</sup> | $R_{\text{int}}$ | $R_{\sigma}$ | $R_1$ | $wR_2$    | $\rho_{\text{max}}$ , e <sup>-</sup> Å <sup>-3</sup> | $\rho_{\text{min}}$ , e <sup>-</sup> Å <sup>-3</sup> | CCDC    |
|------|--------------------------------------------------------------------|-------------|------------|-----------|----------------------|-----------------------|-----------------------------|----------------------------------------|------------------|--------------|-------|-----------|------------------------------------------------------|------------------------------------------------------|---------|
| 100  |                                                                    |             | 11.0737(1) | 8.3989(1) | 891.946(19)          | 49302                 | 4357                        | 0.940                                  | 5.44             | 2.39         | 2.45  | 6.43      | 1.50                                                 | -1.12                                                | 2450785 |
| 120  |                                                                    |             | 11.0752(1) | 8.3980(1) | 892.092(19)          | 49339                 | 4358                        | 0.940                                  | 5.56             | 2.45         | 2.52  | 6.63      | 1.63                                                 | -1.08                                                | 2450786 |
| 140  |                                                                    |             | 11.0771(1) | 8.3976(1) | 892.355(19)          | 49331                 | 4358                        | 0.940                                  | 5.46             | 2.42         | 2.54  | 6.79      | 1.85                                                 | -1.05                                                | 2450787 |
| 160  |                                                                    |             | 11.0805(1) | 8.3974(1) | 892.882(19)          | 49389                 | 4359                        | 0.940                                  | 5.66             | 2.53         | 2.57  | 6.85      | 1.66                                                 | -1.07                                                | 2450788 |
| 180  |                                                                    |             | 11.0828(1) | 8.3957(1) | 893.072(19)          | 49392                 | 4360                        | 0.939                                  | 5.65             | 2.47         | 2.65  | 7.10      | 1.66                                                 | -0.94                                                | 2450789 |
| 200  |                                                                    |             | 11.0857(1) | 8.3959(1) | 893.561(19)          | 49427                 | 4363                        | 0.941                                  | 5.62             | 2.46         | 2.48  | 6.67      | 1.30                                                 | -0.96                                                | 2450790 |
| 220  |                                                                    |             | 11.0882(1) | 8.3952(1) | 893.889(19)          | 49457                 | 4366                        | 0.940                                  | 5.69             | 2.49         | 2.56  | 6.88      | 1.16                                                 | -1.04                                                | 2450791 |
| 240  |                                                                    |             | 11.0911(1) | 8.3954(1) | 894.378(19)          | 49480                 | 4366                        | 0.941                                  | 5.75             | 2.55         | 2.62  | 7.03      | 1.14                                                 | -1.18                                                | 2450792 |
| 260  | (KI)Cu <sub>5</sub> O <sub>2</sub> (VO <sub>4</sub> ) <sub>2</sub> | <i>P31m</i> | 11.0934(1) | 8.3944(1) | 894.642(19)          | 49510                 | 4369                        | 0.941                                  | 5.72             | 2.55         | 2.74  | 7.33      | 1.33                                                 | -1.20                                                | 2450793 |
| 280  |                                                                    |             | 11.0963(2) | 8.3940(1) | 895.07(3)            | 49524                 | 4372                        | 0.941                                  | 5.74             | 2.60         | 2.78  | 7.42      | 1.52                                                 | -1.28                                                | 2450794 |
| 300  |                                                                    |             | 11.0993(2) | 8.3940(1) | 895.55(3)            | 49551                 | 4373                        | 0.941                                  | 5.87             | 2.68         | 2.84  | 7.36      | 1.53                                                 | -1.36                                                | 2450795 |
| 320  |                                                                    |             | 11.1026(2) | 8.3948(1) | 896.17(3)            | 49604                 | 4376                        | 0.940                                  | 5.83             | 2.61         | 2.91  | 8.22      | 1.78                                                 | -1.54                                                | 2450796 |
| 340  |                                                                    |             | 11.1063(2) | 8.3936(1) | 896.64(3)            | 49634                 | 4380                        | 0.941                                  | 5.88             | 2.65         | 3.09  | 8.70      | 1.87                                                 | -1.54                                                | 2450797 |
| 360  |                                                                    |             | 11.1108(2) | 8.3940(1) | 897.41(3)            | 49659                 | 4383                        | 0.941                                  | 5.87             | 2.65         | 3.20  | 9.16      | 2.01                                                 | -1.68                                                | 2450798 |
| 380  |                                                                    |             | 11.1159(2) | 8.3957(1) | 898.41(3)            | 49731                 | 4386                        | 0.941                                  | 5.92             | 2.67         | 3.33  | 9.45      | 2.28                                                 | -1.87                                                | 2450799 |
| 400  |                                                                    |             | 11.1188(2) | 8.3948(2) | 898.79(4)            | 49769                 | 4389                        | 0.940                                  | 5.86             | 2.68         | 3.50  | 10.1<br>1 | 2.46                                                 | -2.09                                                | 2450784 |

**Table S1** (continued).

| T, K | Formula                                                           | Space Group | $a$ , Å    | $c$ , Å   | $V$ , Å <sup>3</sup> | Reflections collected | Unique reflections in total | $\sin\theta/\lambda$ , Å <sup>-1</sup> | $R_{\text{int}}$ | $R_{\sigma}$ | $R_1$ | $wR_2$ | $\rho_{\text{max}}$ , e <sup>-</sup> Å <sup>-3</sup> | $\rho_{\text{min}}$ , e <sup>-</sup> Å <sup>-3</sup> | CCDC |
|------|-------------------------------------------------------------------|-------------|------------|-----------|----------------------|-----------------------|-----------------------------|----------------------------------------|------------------|--------------|-------|--------|------------------------------------------------------|------------------------------------------------------|------|
| 100  |                                                                   |             | 11.0737(1) | 8.3989(1) | 891.946(19)          | 49302                 | 4101                        | 0.940                                  | 5.63             | 2.36         | 4.49  | 10.26  | 2.36                                                 | -3.79                                                | -    |
| 120  |                                                                   |             | 11.0752(1) | 8.3980(1) | 892.092(19)          | 49339                 | 4103                        | 0.940                                  | 5.72             | 2.38         | 4.27  | 10.12  | 2.59                                                 | -3.15                                                | -    |
| 140  |                                                                   |             | 11.0771(1) | 8.3976(1) | 892.355(19)          | 49331                 | 4106                        | 0.940                                  | 5.68             | 2.37         | 4.05  | 9.59   | 2.70                                                 | -2.87                                                | -    |
| 160  |                                                                   |             | 11.0805(1) | 8.3974(1) | 892.882(19)          | 49389                 | 4107                        | 0.940                                  | 5.79             | 2.44         | 3.8   | 9.13   | 2.19                                                 | -2.36                                                | -    |
| 180  |                                                                   |             | 11.0828(1) | 8.3957(1) | 893.072(19)          | 49392                 | 4108                        | 0.939                                  | 5.85             | 2.46         | 3.55  | 8.31   | 1.84                                                 | -2.30                                                | -    |
| 200  |                                                                   |             | 11.0857(1) | 8.3959(1) | 893.561(19)          | 49427                 | 4110                        | 0.941                                  | 5.84             | 2.43         | 3.39  | 7.97   | 1.62                                                 | -1.70                                                | -    |
| 220  |                                                                   |             | 11.0882(1) | 8.3952(1) | 893.889(19)          | 49457                 | 4114                        | 0.940                                  | 5.86             | 2.44         | 3.19  | 7.63   | 1.40                                                 | -1.35                                                | -    |
| 240  | (K)Cu <sub>5</sub> O <sub>2</sub> (VO <sub>4</sub> ) <sub>2</sub> | $P\bar{3}$  | 11.0911(1) | 8.3954(1) | 894.378(19)          | 49480                 | 4116                        | 0.941                                  | 5.90             | 2.48         | 3.08  | 7.34   | 1.33                                                 | -1.42                                                | -    |
| 260  |                                                                   |             | 11.0934(1) | 8.3944(1) | 894.642(19)          | 49510                 | 4118                        | 0.941                                  | 5.85             | 2.47         | 3.03  | 7.48   | 1.64                                                 | -1.30                                                | -    |
| 280  |                                                                   |             | 11.0963(2) | 8.3940(1) | 895.07(3)            | 49524                 | 4119                        | 0.941                                  | 5.96             | 2.51         | 3.02  | 7.15   | 1.81                                                 | -1.60                                                | -    |
| 300  |                                                                   |             | 11.0993(2) | 8.3940(1) | 895.55(3)            | 49551                 | 4120                        | 0.941                                  | 5.97             | 2.56         | 3.00  | 7.48   | 2.18                                                 | -1.79                                                | -    |
| 320  |                                                                   |             | 11.1026(2) | 8.3948(1) | 896.17(3)            | 49604                 | 4126                        | 0.940                                  | 6.00             | 2.51         | 3.05  | 7.66   | 2.21                                                 | -1.93                                                | -    |
| 340  |                                                                   |             | 11.1063(2) | 8.3936(1) | 896.64(3)            | 49634                 | 4129                        | 0.941                                  | 6.03             | 2.54         | 3.18  | 8.48   | 2.55                                                 | -2.09                                                | -    |
| 360  |                                                                   |             | 11.1108(2) | 8.3940(1) | 897.41(3)            | 49659                 | 4133                        | 0.941                                  | 6.16             | 2.55         | 3.23  | 8.65   | 2.59                                                 | -2.30                                                | -    |
| 380  |                                                                   |             | 11.1159(2) | 8.3957(1) | 898.41(3)            | 49731                 | 4136                        | 0.941                                  | 6.09             | 2.56         | 3.47  | 9.22   | 2.88                                                 | -2.36                                                | -    |
| 400  |                                                                   |             | 11.1188(2) | 8.3948(2) | 898.79(4)            | 49769                 | 4138                        | 0.940                                  | 6.19             | 2.55         | 3.55  | 9.59   | 2.86                                                 | -2.69                                                | -    |

**Table S1** (continued).

| T, K | Formula                                                             | Space Group  | $a$ , Å      | $c$ , Å     | $V$ , Å <sup>3</sup> | Reflections collected | Unique reflections in total | $\sin\theta/\lambda$ , Å <sup>-1</sup> | $R_{\text{int}}$ | $R_{\sigma}$ | $R_1$ | $wR_2$ | $\rho_{\text{max}}$ , e <sup>-</sup> Å <sup>-3</sup> | $\rho_{\text{min}}$ , e <sup>-</sup> Å <sup>-3</sup> | CCDC    |
|------|---------------------------------------------------------------------|--------------|--------------|-------------|----------------------|-----------------------|-----------------------------|----------------------------------------|------------------|--------------|-------|--------|------------------------------------------------------|------------------------------------------------------|---------|
| 100  |                                                                     |              | 11.10846(15) | 8.38498(11) | 896.07(3)            | 49404                 | 4347                        | 0.940                                  | 5.86             | 2.86         | 2.37  | 5.28   | 0.79                                                 | -0.96                                                | 2450921 |
| 102  |                                                                     |              | 11.10702(15) | 8.38437(11) | 895.77(3)            | 49383                 | 4344                        | 0.940                                  | 5.82             | 2.93         | 2.43  | 5.52   | 0.75                                                 | -1.19                                                | 2450947 |
| 104  |                                                                     |              | 11.10671(15) | 8.3841(1)   | 895.69(3)            | 49409                 | 4346                        | 0.940                                  | 5.84             | 2.85         | 2.48  | 5.93   | 1.01                                                 | -1.22                                                | 2450937 |
| 106  |                                                                     |              | 11.10826(15) | 8.38438(11) | 895.97(3)            | 49408                 | 4344                        | 0.940                                  | 5.82             | 2.85         | 2.45  | 5.70   | 0.99                                                 | -1.34                                                | 2450944 |
| 108  |                                                                     |              | 11.10799(15) | 8.3845(1)   | 895.94(3)            | 49415                 | 4346                        | 0.940                                  | 5.76             | 2.76         | 2.45  | 5.78   | 0.94                                                 | -1.14                                                | 2450948 |
| 110  |                                                                     |              | 11.10806(15) | 8.38469(11) | 895.97(3)            | 49381                 | 4346                        | 0.940                                  | 5.73             | 2.82         | 2.45  | 5.86   | 0.69                                                 | -1.01                                                | 2450940 |
| 112  |                                                                     | $P31m$       | 11.10857(15) | 8.38468(11) | 896.05(3)            | 49420                 | 4347                        | 0.940                                  | 5.64             | 2.78         | 2.47  | 5.95   | 0.72                                                 | -1.09                                                | 2450942 |
| 114  |                                                                     |              | 11.10905(16) | 8.38449(12) | 896.11(3)            | 49422                 | 4346                        | 0.940                                  | 5.62             | 2.79         | 2.44  | 5.83   | 0.72                                                 | -1.08                                                | 2450946 |
| 116  |                                                                     |              | 11.10909(16) | 8.38536(12) | 896.21(3)            | 49423                 | 4346                        | 0.940                                  | 5.57             | 2.76         | 2.38  | 5.86   | 0.80                                                 | -1.16                                                | 2450941 |
| 118  |                                                                     |              | 11.10914(16) | 8.38522(12) | 896.2(0)             | 49394                 | 4346                        | 0.940                                  | 5.52             | 2.72         | 2.47  | 6.11   | 0.87                                                 | -0.99                                                | 2450939 |
| 120  |                                                                     |              | 11.1114(2)   | 8.3861(1)   | 896.66(3)            | 49399                 | 4345                        | 0.940                                  | 5.48             | 2.77         | 2.29  | 5.56   | 0.79                                                 | -1.07                                                | 2450945 |
| 122  |                                                                     |              | 11.11152(16) | 8.38672(12) | 896.75(3)            | 49381                 | 4345                        | 0.940                                  | 5.56             | 2.74         | 2.39  | 6.05   | 0.74                                                 | -1.04                                                | 2450938 |
| 124  |                                                                     |              | 11.11154(16) | 8.38609(12) | 896.68(3)            | 49371                 | 4344                        | 0.940                                  | 5.38             | 2.78         | 2.48  | 6.56   | 0.84                                                 | -1.10                                                | 2450943 |
| 130  |                                                                     |              | 6.4151(1)    | 8.3878(1)   | 298.941(10)          | 16571                 | 821                         | 0.940                                  | 5.21             | 1.47         | 1.37  | 3.32   | 0.73                                                 | -1.07                                                | 2450936 |
| 140  | (CsI)Cu <sub>5</sub> O <sub>2</sub> (VO <sub>4</sub> ) <sub>2</sub> |              | 6.4158(1)    | 8.3874(1)   | 298.992(10)          | 16574                 | 822                         | 0.940                                  | 5.14             | 1.48         | 1.42  | 3.25   | 0.78                                                 | -1.20                                                | 2450929 |
| 160  |                                                                     |              | 6.4164(1)    | 8.3868(1)   | 299.026(10)          | 16583                 | 821                         | 0.940                                  | 4.81             | 1.38         | 1.42  | 3.31   | 0.93                                                 | -1.31                                                | 2450928 |
| 180  |                                                                     |              | 6.4175(1)    | 8.3877(1)   | 299.161(10)          | 16605                 | 822                         | 0.940                                  | 4.66             | 1.37         | 1.50  | 3.62   | 1.31                                                 | -1.61                                                | 2450930 |
| 200  |                                                                     |              | 6.4178(1)    | 8.3883(1)   | 299.211(10)          | 16630                 | 822                         | 0.941                                  | 4.60             | 1.37         | 1.55  | 3.42   | 1.33                                                 | -1.66                                                | 2450933 |
| 220  |                                                                     |              | 6.4184(1)    | 8.3885(1)   | 299.274(10)          | 16617                 | 821                         | 0.938                                  | 4.69             | 1.37         | 1.65  | 3.71   | 1.48                                                 | -1.74                                                | 2450923 |
| 240  |                                                                     |              | 6.4191(1)    | 8.3882(1)   | 299.328(10)          | 16632                 | 822                         | 0.941                                  | 4.71             | 1.38         | 1.72  | 3.88   | 1.61                                                 | -1.94                                                | 2450926 |
| 260  |                                                                     | $P\bar{3}m1$ | 6.4195(1)    | 8.3884(1)   | 299.373(10)          | 16646                 | 822                         | 0.941                                  | 4.84             | 1.41         | 1.87  | 4.52   | 1.60                                                 | -2.17                                                | 2450932 |
| 280  |                                                                     |              | 6.4204(1)    | 8.3889(1)   | 299.474(10)          | 16672                 | 823                         | 0.941                                  | 5.01             | 1.47         | 1.96  | 4.51   | 1.92                                                 | -2.26                                                | 2450935 |
| 300  |                                                                     |              | 6.4214(1)    | 8.3909(1)   | 299.639(10)          | 16681                 | 823                         | 0.941                                  | 5.08             | 1.49         | 2.10  | 4.68   | 2.00                                                 | -2.42                                                | 2450924 |
| 320  |                                                                     |              | 6.4230(1)    | 8.3913(1)   | 299.803(10)          | 16703                 | 823                         | 0.940                                  | 5.29             | 1.58         | 2.19  | 5.28   | 2.03                                                 | -2.56                                                | 2450925 |
| 340  |                                                                     |              | 6.4235(1)    | 8.3913(1)   | 299.849(10)          | 16702                 | 823                         | 0.940                                  | 5.37             | 1.57         | 2.30  | 5.35   | 2.19                                                 | -2.53                                                | 2450934 |
| 360  |                                                                     |              | 6.4250(1)    | 8.3926(1)   | 300.036(10)          | 16667                 | 822                         | 0.940                                  | 5.38             | 1.57         | 2.35  | 5.28   | 2.52                                                 | -2.75                                                | 2450927 |
| 380  |                                                                     |              | 6.4265(1)    | 8.3924(1)   | 300.169(10)          | 16711                 | 823                         | 0.940                                  | 5.55             | 1.63         | 2.58  | 5.68   | 2.43                                                 | -2.86                                                | 2450931 |
| 400  |                                                                     |              | 6.4280(1)    | 8.3947(1)   | 300.391(10)          | 16747                 | 825                         | 0.940                                  | 5.49             | 1.60         | 2.62  | 5.98   | 2.55                                                 | -2.84                                                | 2450922 |

**Table S1** (continued).

| T, K | Formula                                                             | Space Group | $a$ , Å      | $c$ , Å     | $V$ , Å <sup>3</sup> | Reflections collected | Unique reflections in total | $\sin\theta/\lambda$ , Å <sup>-1</sup> | $R_{\text{int}}$ | $R_{\sigma}$ | $R_1$ | $wR_2$ | $\rho_{\text{max}}$ , e <sup>-</sup> Å <sup>-3</sup> | $\rho_{\text{min}}$ , e <sup>-</sup> Å <sup>-3</sup> | CCDC |
|------|---------------------------------------------------------------------|-------------|--------------|-------------|----------------------|-----------------------|-----------------------------|----------------------------------------|------------------|--------------|-------|--------|------------------------------------------------------|------------------------------------------------------|------|
| 100  |                                                                     |             | 11.10846(15) | 8.38498(11) | 896.07(3)            | 49404                 | 4106                        | 0.940                                  | 5.96             | 2.48         | 2.22  | 4.95   | 0.89                                                 | -1.21                                                | -    |
| 102  |                                                                     |             | 11.10702(15) | 8.38437(11) | 895.77(3)            | 49383                 | 4104                        | 0.940                                  | 5.93             | 2.52         | 2.27  | 5.02   | 0.88                                                 | -1.30                                                | -    |
| 104  |                                                                     |             | 11.10671(15) | 8.3841(1)   | 895.69(3)            | 49409                 | 4106                        | 0.940                                  | 6.00             | 2.48         | 2.29  | 5.24   | 0.94                                                 | -1.20                                                | -    |
| 106  |                                                                     |             | 11.10826(15) | 8.38438(11) | 895.97(3)            | 49408                 | 4104                        | 0.940                                  | 5.9              | 2.43         | 2.26  | 5.11   | 1.13                                                 | -1.26                                                | -    |
| 108  |                                                                     |             | 11.10799(15) | 8.3845(1)   | 895.94(3)            | 49415                 | 4106                        | 0.940                                  | 5.87             | 2.37         | 2.26  | 5.20   | 0.95                                                 | -1.15                                                | -    |
| 110  |                                                                     |             | 11.10806(15) | 8.38469(11) | 895.97(3)            | 49381                 | 4106                        | 0.940                                  | 5.88             | 2.4          | 2.27  | 5.13   | 0.89                                                 | -1.16                                                | -    |
| 112  | (CsI)Cu <sub>5</sub> O <sub>2</sub> (VO <sub>4</sub> ) <sub>2</sub> | $P\bar{3}$  | 11.10857(15) | 8.38468(11) | 896.05(3)            | 49420                 | 4107                        | 0.940                                  | 5.75             | 2.36         | 2.30  | 5.33   | 0.93                                                 | -1.14                                                | -    |
| 114  |                                                                     |             | 11.10905(16) | 8.38449(12) | 896.11(3)            | 49422                 | 4106                        | 0.940                                  | 5.74             | 2.36         | 2.20  | 5.07   | 0.83                                                 | -1.22                                                | -    |
| 116  |                                                                     |             | 11.10909(16) | 8.38536(12) | 896.21(3)            | 49423                 | 4109                        | 0.940                                  | 5.67             | 2.34         | 2.31  | 5.78   | 1.04                                                 | -1.45                                                | -    |
| 118  |                                                                     |             | 11.10914(16) | 8.38522(12) | 896.2(0)             | 49394                 | 4109                        | 0.940                                  | 5.65             | 2.31         | 2.34  | 5.96   | 0.90                                                 | -1.14                                                | -    |
| 120  |                                                                     |             | 11.1114(2)   | 8.3861(1)   | 896.66(3)            | 49399                 | 4108                        | 0.940                                  | 5.57             | 2.33         | 2.30  | 5.57   | 0.99                                                 | -1.20                                                | -    |
| 122  |                                                                     |             | 11.11152(16) | 8.38672(12) | 896.75(3)            | 49381                 | 4108                        | 0.940                                  | 5.67             | 2.30         | 2.31  | 6.24   | 0.85                                                 | -1.15                                                | -    |
| 124  |                                                                     |             | 11.11154(16) | 8.38609(12) | 896.68(3)            | 49371                 | 4107                        | 0.940                                  | 5.50             | 2.33         | 2.41  | 6.46   | 1.04                                                 | -1.25                                                | -    |

Table S1 (continued).

| T, K | Formula                                                              | Space Group  | $a$ , Å      | $c$ , Å     | $V$ , Å <sup>3</sup> | Reflections collected | Unique reflections in total | $\sin\theta/\lambda$ , Å <sup>-1</sup> | $R_{\text{int}}$ | $R_{\sigma}$ | $R_1$ | $wR_2$ | $\rho_{\text{max}}$ , e <sup>-</sup> Å <sup>-3</sup> | $\rho_{\text{min}}$ , e <sup>-</sup> Å <sup>-3</sup> | CCDC    |
|------|----------------------------------------------------------------------|--------------|--------------|-------------|----------------------|-----------------------|-----------------------------|----------------------------------------|------------------|--------------|-------|--------|------------------------------------------------------|------------------------------------------------------|---------|
| 100  |                                                                      |              | 11.0574(2)   | 8.3888(1)   | 888.25(3)            | 96848                 | 4325                        | 0.939                                  | 8.23             | 3.13         | 3.20  | 10.80  | 2.12                                                 | -1.17                                                | 2450913 |
| 102  |                                                                      |              | 11.0572(2)   | 8.3888(1)   | 888.22(3)            | 96870                 | 4326                        | 0.939                                  | 8.02             | 3.03         | 3.15  | 10.81  | 2.14                                                 | -1.23                                                | 2450912 |
| 104  |                                                                      |              | 11.05625(15) | 8.38489(13) | 887.65(3)            | 96890                 | 4325                        | 0.938                                  | 7.70             | 3.08         | 3.14  | 10.19  | 2.23                                                 | -1.09                                                | 2450915 |
| 106  |                                                                      |              | 11.06071(16) | 8.3882(1)   | 888.72(3)            | 96991                 | 4330                        | 0.939                                  | 7.67             | 3.00         | 3.13  | 10.33  | 2.26                                                 | -1.05                                                | 2450918 |
| 108  |                                                                      |              | 11.0562(2)   | 8.389(0)    | 888.08(3)            | 96904                 | 4327                        | 0.939                                  | 7.62             | 2.91         | 3.09  | 9.95   | 2.28                                                 | -1.13                                                | 2450920 |
| 110  |                                                                      | $P31m$       | 11.0598(2)   | 8.387(0)    | 888.45(3)            | 97015                 | 4329                        | 0.939                                  | 7.58             | 2.87         | 3.17  | 10.08  | 2.24                                                 | -1.18                                                | 2450917 |
| 112  |                                                                      |              | 11.0573(2)   | 8.3881(1)   | 888.16(3)            | 96912                 | 4325                        | 0.938                                  | 7.55             | 2.71         | 3.09  | 9.88   | 2.19                                                 | -1.27                                                | 2450910 |
| 114  |                                                                      |              | 11.056(0)    | 8.3877(1)   | 887.91(3)            | 96898                 | 4326                        | 0.939                                  | 7.63             | 2.86         | 3.11  | 10.19  | 2.16                                                 | -1.28                                                | 2450914 |
| 116  |                                                                      |              | 11.0598(2)   | 8.3881(1)   | 888.56(3)            | 96862                 | 4326                        | 0.938                                  | 7.49             | 2.71         | 3.04  | 10.06  | 2.21                                                 | -1.27                                                | 2450916 |
| 118  |                                                                      |              | 11.0603(2)   | 8.3884(1)   | 888.68(3)            | 96902                 | 4327                        | 0.938                                  | 7.42             | 2.69         | 3.10  | 10.26  | 2.19                                                 | -1.33                                                | 2450911 |
| 120  |                                                                      |              | 11.0574(2)   | 8.3886(1)   | 888.23(3)            | 96824                 | 4325                        | 0.938                                  | 7.33             | 2.59         | 3.07  | 10.66  | 2.18                                                 | -1.23                                                | 2450919 |
| 140  |                                                                      |              | 6.3858(1)    | 8.3842(2)   | 296.089(12)          | 16341                 | 810                         | 0.937                                  | 6.03             | 1.82         | 2.50  | 6.52   | 2.16                                                 | -2.28                                                | 2450896 |
| 160  | (CsBr)Cu <sub>5</sub> O <sub>2</sub> (VO <sub>4</sub> ) <sub>2</sub> |              | 6.3869(1)    | 8.3862(2)   | 296.262(12)          | 16362                 | 811                         | 0.937                                  | 6.55             | 1.97         | 2.47  | 6.44   | 1.86                                                 | -2.10                                                | 2450897 |
| 180  |                                                                      |              | 6.3867(1)    | 8.3861(2)   | 296.24(1)            | 16355                 | 813                         | 0.937                                  | 6.46             | 2.01         | 2.50  | 6.49   | 1.68                                                 | -2.20                                                | 2450898 |
| 200  |                                                                      |              | 6.3877(1)    | 8.3867(2)   | 296.354(12)          | 16368                 | 813                         | 0.937                                  | 6.24             | 1.97         | 2.60  | 6.72   | 1.57                                                 | -2.23                                                | 2450900 |
| 220  |                                                                      |              | 6.3878(1)    | 8.3846(2)   | 296.289(12)          | 16373                 | 812                         | 0.937                                  | 6.64             | 2.00         | 2.62  | 6.92   | 1.72                                                 | -2.29                                                | 2450904 |
| 240  |                                                                      |              | 6.3877(1)    | 8.3856(2)   | 296.315(12)          | 16358                 | 812                         | 0.937                                  | 6.69             | 2.01         | 2.74  | 6.91   | 1.79                                                 | -2.41                                                | 2450903 |
| 260  |                                                                      |              | 6.3888(1)    | 8.3858(2)   | 296.424(12)          | 16387                 | 813                         | 0.937                                  | 6.99             | 2.03         | 2.74  | 7.09   | 1.82                                                 | -2.47                                                | 2450899 |
| 280  |                                                                      | $P\bar{3}m1$ | 6.3892(1)    | 8.3858(2)   | 296.461(12)          | 16383                 | 814                         | 0.937                                  | 7.27             | 2.11         | 2.88  | 7.59   | 2.17                                                 | -2.68                                                | 2450901 |
| 300  |                                                                      |              | 6.3903(1)    | 8.3867(2)   | 296.595(12)          | 16405                 | 813                         | 0.937                                  | 7.27             | 2.13         | 2.95  | 7.49   | 2.04                                                 | -2.72                                                | 2450902 |
| 320  |                                                                      |              | 6.3907(1)    | 8.3864(2)   | 296.622(12)          | 16405                 | 814                         | 0.937                                  | 7.35             | 2.17         | 3.08  | 7.90   | 2.14                                                 | -2.88                                                | 2450905 |
| 340  |                                                                      |              | 6.3921(1)    | 8.3876(2)   | 296.794(12)          | 16407                 | 814                         | 0.937                                  | 7.51             | 2.23         | 3.16  | 7.93   | 2.23                                                 | -3.02                                                | 2450908 |
| 360  |                                                                      |              | 6.3928(1)    | 8.3875(2)   | 296.856(12)          | 16408                 | 814                         | 0.937                                  | 7.49             | 2.21         | 3.18  | 7.92   | 2.33                                                 | -3.09                                                | 2450906 |
| 380  |                                                                      |              | 6.3929(1)    | 8.3863(2)   | 296.822(12)          | 16410                 | 814                         | 0.934                                  | 7.80             | 2.32         | 3.17  | 8.27   | 2.53                                                 | -3.08                                                | 2450907 |
| 400  |                                                                      |              | 6.3969(1)    | 8.3887(2)   | 297.279(12)          | 16417                 | 814                         | 0.934                                  | 7.55             | 2.25         | 3.27  | 8.45   | 2.50                                                 | -3.09                                                | 2450909 |

**Table S1** (continued).

| T, K | Formula                                                              | Space Group | $a$ , Å      | $c$ , Å     | $V$ , Å <sup>3</sup> | Reflections collected | Unique reflections in total | $\sin\theta/\lambda$ , Å <sup>-1</sup> | $R_{\text{int}}$ | $R_{\sigma}$ | $R_1$ | $wR_2$ | $\rho_{\text{max}}$ , e <sup>-</sup> Å <sup>-3</sup> | $\rho_{\text{min}}$ , e <sup>-</sup> Å <sup>-3</sup> | CCDC |
|------|----------------------------------------------------------------------|-------------|--------------|-------------|----------------------|-----------------------|-----------------------------|----------------------------------------|------------------|--------------|-------|--------|------------------------------------------------------|------------------------------------------------------|------|
| 100  |                                                                      |             | 11.0574(2)   | 8.3888(1)   | 888.25(3)            | 96848                 | 4071                        | 0.939                                  | 8.39             | 2.70         | 3.06  | 10.56  | 2.11                                                 | -1.70                                                | -    |
| 102  |                                                                      |             | 11.0572(2)   | 8.3888(1)   | 888.22(3)            | 96870                 | 4071                        | 0.939                                  | 8.19             | 2.61         | 3.03  | 10.52  | 2.18                                                 | -1.69                                                | -    |
| 104  |                                                                      |             | 11.05625(15) | 8.38489(13) | 887.65(3)            | 96890                 | 4070                        | 0.938                                  | 7.86             | 2.63         | 3.03  | 10.03  | 2.30                                                 | -1.57                                                | -    |
| 106  |                                                                      |             | 11.06071(16) | 8.3882(1)   | 888.72(3)            | 96991                 | 4074                        | 0.939                                  | 7.81             | 2.55         | 2.98  | 9.71   | 2.34                                                 | -1.50                                                | -    |
| 108  |                                                                      |             | 11.0562(2)   | 8.389(0)    | 888.08(3)            | 96904                 | 4072                        | 0.939                                  | 7.76             | 2.48         | 2.96  | 9.71   | 2.27                                                 | -1.56                                                | -    |
| 110  | (CsBr)Cu <sub>5</sub> O <sub>2</sub> (VO <sub>4</sub> ) <sub>2</sub> | $P\bar{3}$  | 11.0598(2)   | 8.387(0)    | 888.45(3)            | 97015                 | 4073                        | 0.939                                  | 7.74             | 2.44         | 3.01  | 9.75   | 2.20                                                 | -1.70                                                | -    |
| 112  |                                                                      |             | 11.0573(2)   | 8.3881(1)   | 888.16(3)            | 96912                 | 4072                        | 0.938                                  | 7.65             | 2.32         | 3.12  | 10.08  | 2.26                                                 | -1.58                                                | -    |
| 114  |                                                                      |             | 11.056(0)    | 8.3877(1)   | 887.91(3)            | 96898                 | 4071                        | 0.939                                  | 7.74             | 2.43         | 3.07  | 10.05  | 2.08                                                 | -1.65                                                | -    |
| 116  |                                                                      |             | 11.0598(2)   | 8.3881(1)   | 888.56(3)            | 96862                 | 4071                        | 0.938                                  | 7.58             | 2.32         | 3.07  | 10.19  | 2.25                                                 | -1.68                                                | -    |
| 118  |                                                                      |             | 11.0603(2)   | 8.3884(1)   | 888.68(3)            | 96902                 | 4072                        | 0.938                                  | 7.52             | 2.30         | 3.07  | 10.14  | 2.18                                                 | -1.59                                                | -    |
| 120  |                                                                      |             | 11.0574(2)   | 8.3886(1)   | 888.23(3)            | 96824                 | 4069                        | 0.938                                  | 7.44             | 2.22         | 3.11  | 10.45  | 2.26                                                 | -1.76                                                | -    |

Table S1 (continued).

| T, K | Formula                                                             | Space Group  | $a$ , Å     | $c$ , Å   | $V$ , Å <sup>3</sup> | Reflections collected | Unique reflections in total | $\sin\theta/\lambda$ , Å <sup>-1</sup> | $R_{\text{int}}$ | $R_{\sigma}$ | $R_1$ | $wR_2$ | $\rho_{\text{max}}$ , e <sup>-</sup> Å <sup>-3</sup> | $\rho_{\text{min}}$ , e <sup>-</sup> Å <sup>-3</sup> | CCDC    |
|------|---------------------------------------------------------------------|--------------|-------------|-----------|----------------------|-----------------------|-----------------------------|----------------------------------------|------------------|--------------|-------|--------|------------------------------------------------------|------------------------------------------------------|---------|
| 100  |                                                                     |              | 11.0901(2)  | 8.3900(1) | 893.64(3)            | 49131                 | 4338                        | 0.939                                  | 6.37             | 3.01         | 2.33  | 5.33   | 1.32                                                 | -0.91                                                | 2451104 |
| 120  |                                                                     |              | 11.0926(2)  | 8.3898(1) | 894.02(3)            | 49136                 | 4340                        | 0.938                                  | 6.45             | 3.11         | 2.40  | 5.56   | 0.99                                                 | -0.94                                                | 2451085 |
| 140  |                                                                     |              | 11.0931(2)  | 8.3878(1) | 893.89(3)            | 49129                 | 4340                        | 0.938                                  | 6.63             | 3.20         | 2.51  | 5.95   | 1.04                                                 | -1.12                                                | 2451101 |
| 160  |                                                                     |              | 11.0966(2)  | 8.3894(1) | 894.63(3)            | 49198                 | 4346                        | 0.938                                  | 6.65             | 3.31         | 2.67  | 6.48   | 1.37                                                 | -1.29                                                | 2451088 |
| 180  |                                                                     |              | 11.0986(2)  | 8.3879(2) | 894.79(4)            | 49191                 | 4348                        | 0.938                                  | 6.81             | 3.41         | 2.73  | 6.58   | 1.42                                                 | -1.41                                                | 2451099 |
| 200  |                                                                     |              | 11.1013(2)  | 8.3884(2) | 895.28(4)            | 49245                 | 4350                        | 0.938                                  | 6.85             | 3.38         | 2.77  | 6.78   | 1.50                                                 | -1.45                                                | 2451105 |
| 220  |                                                                     |              | 11.1032(2)  | 8.3868(2) | 895.41(4)            | 49264                 | 4352                        | 0.938                                  | 7.03             | 3.50         | 2.78  | 6.52   | 0.61                                                 | -1.17                                                | 2451103 |
| 240  |                                                                     |              | 11.1060(2)  | 8.3886(2) | 896.06(4)            | 49268                 | 4354                        | 0.937                                  | 7.28             | 3.64         | 2.80  | 6.68   | 0.63                                                 | -1.39                                                | 2451086 |
| 260  |                                                                     |              | 11.1100(2)  | 8.3884(2) | 896.68(4)            | 49304                 | 4360                        | 0.940                                  | 7.51             | 3.74         | 2.82  | 6.78   | 0.76                                                 | -1.54                                                | 2451100 |
| 280  |                                                                     |              | 11.1117(2)  | 8.3895(2) | 897.07(4)            | 49321                 | 4364                        | 0.940                                  | 7.93             | 3.96         | 3.05  | 7.36   | 0.91                                                 | -1.58                                                | 2451102 |
| 300  |                                                                     | $P31m$       | 11.1145(2)  | 8.3894(2) | 897.51(4)            | 49323                 | 4366                        | 0.939                                  | 8.17             | 4.35         | 3.36  | 8.51   | 1.29                                                 | -1.64                                                | 2451098 |
| 310  |                                                                     |              | 11.1155(2)  | 8.3879(2) | 897.52(4)            | 49335                 | 4367                        | 0.939                                  | 8.26             | 4.39         | 3.36  | 8.63   | 1.20                                                 | -1.69                                                | 2451097 |
| 320  | (RbI)Cu <sub>5</sub> O <sub>2</sub> (VO <sub>4</sub> ) <sub>2</sub> |              | 11.1159(2)  | 8.3894(2) | 897.74(4)            | 49337                 | 4367                        | 0.939                                  | 8.15             | 4.20         | 3.32  | 8.68   | 1.12                                                 | -1.77                                                | 2451087 |
| 330  |                                                                     |              | 11.1166(3)  | 8.3855(2) | 897.44(5)            | 49337                 | 4369                        | 0.939                                  | 8.30             | 4.52         | 3.70  | 9.93   | 1.36                                                 | -2.13                                                | 2451090 |
| 340  |                                                                     |              | 11.1175(3)  | 8.3864(2) | 897.68(5)            | 49316                 | 4369                        | 0.939                                  | 8.38             | 4.60         | 3.92  | 10.96  | 1.51                                                 | -2.14                                                | 2451094 |
| 350  |                                                                     |              | 11.1200(3)  | 8.3880(2) | 898.25(5)            | 49328                 | 4371                        | 0.939                                  | 8.27             | 4.54         | 3.93  | 11.13  | 1.44                                                 | -2.20                                                | 2451089 |
| 360  |                                                                     |              | 11.1228(3)  | 8.3897(2) | 898.89(5)            | 49290                 | 4371                        | 0.939                                  | 8.41             | 4.70         | 4.10  | 12.19  | 1.58                                                 | -2.43                                                | 2451093 |
| 364  |                                                                     |              | 11.1260(3)  | 8.3926(2) | 899.72(5)            | 49286                 | 4371                        | 0.938                                  | 8.49             | 4.91         | 4.22  | 12.92  | 1.87                                                 | -2.66                                                | 2451096 |
| 368  |                                                                     |              | 11.1249(3)  | 8.3904(2) | 899.30(5)            | 49272                 | 4369                        | 0.938                                  | 8.38             | 4.87         | 4.39  | 14.16  | 2.23                                                 | -2.93                                                | 2451091 |
| 372  |                                                                     |              | 11.1252(3)  | 8.3916(2) | 899.48(5)            | 49238                 | 4368                        | 0.938                                  | 8.38             | 4.82         | 4.55  | 14.79  | 2.39                                                 | -2.92                                                | 2451095 |
| 376  |                                                                     |              | 11.1267(3)  | 8.3922(2) | 899.79(5)            | 49226                 | 4368                        | 0.938                                  | 8.41             | 4.93         | 4.45  | 15.26  | 2.55                                                 | -3.05                                                | 2451092 |
| 378  |                                                                     |              | 6.4226(2)   | 8.3905(2) | 299.737(18)          | 16461                 | 823                         | 0.939                                  | 6.87             | 2.16         | 3.09  | 7.09   | 3.39                                                 | -4.07                                                | 2451083 |
| 380  |                                                                     |              | 6.4200(2)   | 8.3876(2) | 299.39(2)            | 16435                 | 823                         | 0.939                                  | 7.13             | 2.25         | 2.99  | 6.72   | 3.06                                                 | -3.82                                                | 2451084 |
| 390  |                                                                     | $P\bar{3}m1$ | 6.4222(2)   | 8.3899(2) | 299.68(2)            | 16443                 | 823                         | 0.939                                  | 7.25             | 2.28         | 2.98  | 6.83   | 3.00                                                 | -3.74                                                | 2451081 |
| 400  |                                                                     |              | 6.42413(16) | 8.3898(2) | 299.856(17)          | 16475                 | 823                         | 0.938                                  | 7.22             | 2.26         | 2.97  | 6.72   | 3.14                                                 | -3.90                                                | 2451082 |

Table S1 (continued).

| T, K | Formula                                                             | Space Group | $a$ , Å    | $c$ , Å   | $V$ , Å <sup>3</sup> | Reflections collected | Unique reflections in total | $\sin\theta/\lambda$ , Å <sup>-1</sup> | $R_{\text{int}}$ | $R_{\sigma}$ | $R_1$ | $wR_2$ | $\rho_{\text{max}}$ , e <sup>-</sup> Å <sup>-3</sup> | $\rho_{\text{min}}$ , e <sup>-</sup> Å <sup>-3</sup> | CCDC |
|------|---------------------------------------------------------------------|-------------|------------|-----------|----------------------|-----------------------|-----------------------------|----------------------------------------|------------------|--------------|-------|--------|------------------------------------------------------|------------------------------------------------------|------|
| 100  |                                                                     |             | 11.0901(2) | 8.3900(1) | 893.64(3)            | 49131                 | 4095                        | 0.939                                  | 6.63             | 2.81         | 7.21  | 17.58  | 6.72                                                 | -12.87                                               | -    |
| 120  |                                                                     |             | 11.0926(2) | 8.3898(1) | 894.02(3)            | 49136                 | 4098                        | 0.938                                  | 6.69             | 2.89         | 5.97  | 14.59  | 4.78                                                 | -10.41                                               | -    |
| 140  |                                                                     |             | 11.0931(2) | 8.3878(1) | 893.89(3)            | 49129                 | 4099                        | 0.938                                  | 6.9              | 2.97         | 5.12  | 12.23  | 4.50                                                 | -8.39                                                | -    |
| 160  |                                                                     |             | 11.0966(2) | 8.3894(1) | 894.63(3)            | 49198                 | 4102                        | 0.938                                  | 6.98             | 3.06         | 4.41  | 10.2   | 3.24                                                 | -6.81                                                | -    |
| 180  |                                                                     |             | 11.0986(2) | 8.3879(2) | 894.79(4)            | 49191                 | 4103                        | 0.938                                  | 7.13             | 3.15         | 3.75  | 8.59   | 2.85                                                 | -4.93                                                | -    |
| 200  |                                                                     |             | 11.1013(2) | 8.3884(2) | 895.28(4)            | 49245                 | 4105                        | 0.938                                  | 7.07             | 3.13         | 3.3   | 7.45   | 1.55                                                 | -3.04                                                | -    |
| 220  |                                                                     |             | 11.1032(2) | 8.3868(2) | 895.41(4)            | 49264                 | 4105                        | 0.938                                  | 7.36             | 3.23         | 2.99  | 6.65   | 1.28                                                 | -2.03                                                | -    |
| 240  |                                                                     |             | 11.1060(2) | 8.3886(2) | 896.06(4)            | 49268                 | 4110                        | 0.937                                  | 7.52             | 3.35         | 2.88  | 6.47   | 1.31                                                 | -1.77                                                | -    |
| 260  |                                                                     |             | 11.1100(2) | 8.3884(2) | 896.68(4)            | 49304                 | 4115                        | 0.940                                  | 7.76             | 3.46         | 2.81  | 6.29   | 1.04                                                 | -1.41                                                | -    |
| 280  |                                                                     |             | 11.1117(2) | 8.3895(2) | 897.07(4)            | 49321                 | 4118                        | 0.940                                  | 8.24             | 3.65         | 2.87  | 6.21   | 1.49                                                 | -1.64                                                | -    |
| 300  | (RbI)Cu <sub>5</sub> O <sub>2</sub> (VO <sub>4</sub> ) <sub>2</sub> | $P\bar{3}$  | 11.1145(2) | 8.3894(2) | 897.51(4)            | 49323                 | 4119                        | 0.939                                  | 8.55             | 3.99         | 3.12  | 7.04   | 1.72                                                 | -1.79                                                | -    |
| 310  |                                                                     |             | 11.1155(2) | 8.3879(2) | 897.52(4)            | 49335                 | 4122                        | 0.939                                  | 8.61             | 4.02         | 3.24  | 7.53   | 1.77                                                 | -2.06                                                | -    |
| 320  |                                                                     |             | 11.1159(2) | 8.3894(2) | 897.74(4)            | 49337                 | 4122                        | 0.939                                  | 8.58             | 3.89         | 3.21  | 7.4    | 1.75                                                 | -2.42                                                | -    |
| 330  |                                                                     |             | 11.1166(3) | 8.3855(2) | 897.44(5)            | 49337                 | 4124                        | 0.939                                  | 8.74             | 4.14         | 3.55  | 8.45   | 1.88                                                 | -2.36                                                | -    |
| 340  |                                                                     |             | 11.1175(3) | 8.3864(2) | 897.68(5)            | 49316                 | 4121                        | 0.939                                  | 8.91             | 4.2          | 3.59  | 8.85   | 2.00                                                 | -2.30                                                | -    |
| 350  |                                                                     |             | 11.1200(3) | 8.3880(2) | 898.25(5)            | 49328                 | 4128                        | 0.939                                  | 8.71             | 4.17         | 3.66  | 9.43   | 2.22                                                 | -2.93                                                | -    |
| 360  |                                                                     |             | 11.1228(3) | 8.3897(2) | 898.89(5)            | 49290                 | 4127                        | 0.939                                  | 8.95             | 4.29         | 3.88  | 10.43  | 2.20                                                 | -2.79                                                | -    |
| 364  |                                                                     |             | 11.1260(3) | 8.3926(2) | 899.72(5)            | 49286                 | 4127                        | 0.938                                  | 9.03             | 4.49         | 3.92  | 11.2   | 2.42                                                 | -3.43                                                | -    |
| 368  |                                                                     |             | 11.1249(3) | 8.3904(2) | 899.30(5)            | 49272                 | 4125                        | 0.938                                  | 8.98             | 4.45         | 3.96  | 11.45  | 2.63                                                 | -3.34                                                | -    |
| 372  |                                                                     |             | 11.1252(3) | 8.3916(2) | 899.48(5)            | 49238                 | 4123                        | 0.938                                  | 8.97             | 4.43         | 4.28  | 12.9   | 3.06                                                 | -3.54                                                | -    |
| 376  |                                                                     |             | 11.1267(3) | 8.3922(2) | 899.79(5)            | 49226                 | 4124                        | 0.938                                  | 9.01             | 4.42         | 4.34  | 13.77  | 3.32                                                 | -3.56                                                | -    |

Table S1 (continued).

| T, K | Formula                                                              | Space Group | $a$ , Å    | $c$ , Å   | $V$ , Å <sup>3</sup> | Reflections collected | Unique reflections in total | $\sin\theta/\lambda$ , Å <sup>-1</sup> | $R_{\text{int}}$ | $R_{\sigma}$ | $R_1$ | $wR_2$ | $\rho_{\text{max}}$ , e <sup>-</sup> Å <sup>-3</sup> | $\rho_{\text{min}}$ , e <sup>-</sup> Å <sup>-3</sup> | CCDC    |
|------|----------------------------------------------------------------------|-------------|------------|-----------|----------------------|-----------------------|-----------------------------|----------------------------------------|------------------|--------------|-------|--------|------------------------------------------------------|------------------------------------------------------|---------|
| 100  |                                                                      |             | 11.0282(1) | 8.3938(1) | 884.094(19)          | 97212                 | 4320                        | 0.940                                  | 6.55             | 2.18         | 2.70  | 7.20   | 1.79                                                 | -1.38                                                | 2451064 |
| 120  |                                                                      |             | 11.0295(1) | 8.3939(1) | 884.313(19)          | 97222                 | 4319                        | 0.939                                  | 6.62             | 2.21         | 2.72  | 7.25   | 1.66                                                 | -1.65                                                | 2451060 |
| 140  |                                                                      |             | 11.0308(1) | 8.3918(1) | 884.300(19)          | 97223                 | 4322                        | 0.940                                  | 6.63             | 2.23         | 2.71  | 7.14   | 1.54                                                 | -1.25                                                | 2451077 |
| 160  |                                                                      |             | 11.0308(1) | 8.392(0)  | 884.321(19)          | 97217                 | 4318                        | 0.940                                  | 6.73             | 2.28         | 2.84  | 7.53   | 1.57                                                 | -1.17                                                | 2451078 |
| 180  |                                                                      |             | 11.0325(2) | 8.3915(1) | 884.54(3)            | 97224                 | 4319                        | 0.939                                  | 7.79             | 2.65         | 2.84  | 7.27   | 1.38                                                 | -1.14                                                | 2451062 |
| 200  |                                                                      |             | 11.0344(2) | 8.3903(1) | 884.72(3)            | 97239                 | 4319                        | 0.939                                  | 6.93             | 2.36         | 2.91  | 7.98   | 1.31                                                 | -1.00                                                | 2451065 |
| 220  |                                                                      |             | 11.0359(2) | 8.3905(1) | 884.98(3)            | 97246                 | 4320                        | 0.939                                  | 7.07             | 2.48         | 3.08  | 8.47   | 1.14                                                 | -1.10                                                | 2451074 |
| 240  |                                                                      |             | 11.0353(2) | 8.3891(1) | 884.74(3)            | 97243                 | 4319                        | 0.939                                  | 7.02             | 2.44         | 2.92  | 7.93   | 1.10                                                 | -1.09                                                | 2451080 |
| 260  |                                                                      |             | 11.0385(2) | 8.3888(1) | 885.22(3)            | 97215                 | 4320                        | 0.939                                  | 7.08             | 2.47         | 2.92  | 7.85   | 1.16                                                 | -1.06                                                | 2451067 |
| 280  |                                                                      |             | 11.0397(2) | 8.3898(1) | 885.52(3)            | 97260                 | 4322                        | 0.939                                  | 7.32             | 2.57         | 3.05  | 8.40   | 1.06                                                 | -1.19                                                | 2451066 |
| 300  | (RbBr)Cu <sub>5</sub> O <sub>2</sub> (VO <sub>4</sub> ) <sub>2</sub> | <i>P31m</i> | 11.0422(2) | 8.3888(1) | 885.81(3)            | 97208                 | 4321                        | 0.939                                  | 7.42             | 2.62         | 3.12  | 8.57   | 1.07                                                 | -1.26                                                | 2451070 |
| 320  |                                                                      |             | 11.0436(2) | 8.3883(1) | 885.98(3)            | 97198                 | 4322                        | 0.939                                  | 7.82             | 2.77         | 3.23  | 8.53   | 1.26                                                 | -1.54                                                | 2451068 |
| 340  |                                                                      |             | 11.0422(5) | 8.3865(4) | 885.57(9)            | 96302                 | 4332                        | 0.939                                  | 8.17             | 2.80         | 3.46  | 9.61   | 1.50                                                 | -1.76                                                | 2451071 |
| 360  |                                                                      |             | 11.0457(2) | 8.3886(2) | 886.35(4)            | 97098                 | 4322                        | 0.939                                  | 8.16             | 3.01         | 3.52  | 9.77   | 1.30                                                 | -1.70                                                | 2451069 |
| 380  |                                                                      |             | 11.0480(2) | 8.3899(2) | 886.86(4)            | 96986                 | 4325                        | 0.939                                  | 8.11             | 3.04         | 3.74  | 11.01  | 1.31                                                 | -1.84                                                | 2451073 |
| 384  |                                                                      |             | 11.0491(2) | 8.3882(2) | 886.86(4)            | 96953                 | 4323                        | 0.938                                  | 8.46             | 3.13         | 3.71  | 10.74  | 1.45                                                 | -1.97                                                | 2451075 |
| 388  |                                                                      |             | 11.0623(2) | 8.3923(2) | 889.41(4)            | 97462                 | 4341                        | 0.938                                  | 7.90             | 2.15         | 4.31  | 12.65  | 1.61                                                 | -2.09                                                | 2451072 |
| 390  |                                                                      |             | 11.0524(2) | 8.3904(2) | 887.62(4)            | 97014                 | 4326                        | 0.938                                  | 8.23             | 3.10         | 3.81  | 10.97  | 1.52                                                 | -1.84                                                | 2451061 |
| 392  |                                                                      |             | 11.0510(2) | 8.3892(2) | 887.27(4)            | 96964                 | 4328                        | 0.939                                  | 8.20             | 3.07         | 3.90  | 11.42  | 1.47                                                 | -1.83                                                | 2451076 |
| 396  |                                                                      |             | 11.0514(2) | 8.3900(2) | 887.42(4)            | 96919                 | 4327                        | 0.939                                  | 8.30             | 3.12         | 3.94  | 11.88  | 1.74                                                 | -2.03                                                | 2451079 |
| 400  |                                                                      |             | 11.0645(2) | 8.3944(2) | 889.99(4)            | 97165                 | 4338                        | 0.938                                  | 8.02             | 3.10         | 4.11  | 12.37  | 1.75                                                 | -2.07                                                | 2451063 |

**Table S1** (continued).

| T, K | Formula                                                              | Space Group | $a$ , Å    | $c$ , Å   | $V$ , Å <sup>3</sup> | Reflections collected | Unique reflections in total | $\sin\theta/\lambda$ , Å <sup>-1</sup> | $R_{\text{int}}$ | $R_{\sigma}$ | $R_1$ | $wR_2$ | $\rho_{\text{max}}$ , e <sup>-</sup> Å <sup>-3</sup> | $\rho_{\text{min}}$ , e <sup>-</sup> Å <sup>-3</sup> | CCDC |
|------|----------------------------------------------------------------------|-------------|------------|-----------|----------------------|-----------------------|-----------------------------|----------------------------------------|------------------|--------------|-------|--------|------------------------------------------------------|------------------------------------------------------|------|
| 100  |                                                                      |             | 11.0282(1) | 8.3938(1) | 884.094(19)          | 97212                 | 4064                        | 0.940                                  | 6.96             | 2.05         | 3.01  | 6.79   | 1.39                                                 | -1.59                                                | –    |
| 120  |                                                                      |             | 11.0295(1) | 8.3939(1) | 884.313(19)          | 97222                 | 4065                        | 0.939                                  | 7.04             | 2.08         | 2.97  | 6.58   | 1.28                                                 | -1.92                                                | –    |
| 140  |                                                                      |             | 11.0308(1) | 8.3918(1) | 884.300(19)          | 97223                 | 4066                        | 0.940                                  | 7.05             | 2.10         | 2.92  | 6.65   | 1.32                                                 | -1.48                                                | –    |
| 160  |                                                                      |             | 11.0308(1) | 8.392(0)  | 884.321(19)          | 97217                 | 4064                        | 0.940                                  | 7.23             | 2.15         | 2.84  | 6.39   | 1.36                                                 | -1.55                                                | –    |
| 180  |                                                                      |             | 11.0325(2) | 8.3915(1) | 884.54(3)            | 97224                 | 4064                        | 0.939                                  | 8.14             | 2.47         | 2.79  | 6.54   | 1.38                                                 | -1.37                                                | –    |
| 200  |                                                                      |             | 11.0344(2) | 8.3903(1) | 884.72(3)            | 97239                 | 4065                        | 0.939                                  | 7.49             | 2.24         | 2.65  | 6.11   | 1.18                                                 | -1.25                                                | –    |
| 220  |                                                                      |             | 11.0359(2) | 8.3905(1) | 884.98(3)            | 97246                 | 4066                        | 0.939                                  | 7.8              | 2.35         | 2.63  | 6.06   | 1.54                                                 | -1.28                                                | –    |
| 240  |                                                                      |             | 11.0353(2) | 8.3891(1) | 884.74(3)            | 97243                 | 4066                        | 0.939                                  | 7.54             | 2.33         | 2.67  | 6.04   | 1.46                                                 | -1.47                                                | –    |
| 260  |                                                                      |             | 11.0385(2) | 8.3888(1) | 885.22(3)            | 97215                 | 4065                        | 0.939                                  | 7.54             | 2.35         | 2.72  | 6.54   | 1.64                                                 | -1.34                                                | –    |
| 280  |                                                                      |             | 11.0397(2) | 8.3898(1) | 885.52(3)            | 97260                 | 4066                        | 0.939                                  | 7.84             | 2.45         | 2.84  | 6.72   | 1.54                                                 | -1.56                                                | –    |
| 300  | (RbBr)Cu <sub>5</sub> O <sub>2</sub> (VO <sub>4</sub> ) <sub>2</sub> | $P\bar{3}$  | 11.0422(2) | 8.3888(1) | 885.81(3)            | 97208                 | 4065                        | 0.939                                  | 7.93             | 2.48         | 2.96  | 6.87   | 1.58                                                 | -1.75                                                | –    |
| 320  |                                                                      |             | 11.0436(2) | 8.3883(1) | 885.98(3)            | 97198                 | 4068                        | 0.939                                  | 8.33             | 2.67         | 3.16  | 7.64   | 1.86                                                 | -1.98                                                | –    |
| 340  |                                                                      |             | 11.0422(5) | 8.3865(4) | 885.57(9)            | 96302                 | 4076                        | 0.939                                  | 8.68             | 2.71         | 3.32  | 8.38   | 2.04                                                 | -2.06                                                | –    |
| 360  |                                                                      |             | 11.0457(2) | 8.3886(2) | 886.35(4)            | 97098                 | 4067                        | 0.939                                  | 8.76             | 2.88         | 3.47  | 8.66   | 2.17                                                 | -2.20                                                | –    |
| 380  |                                                                      |             | 11.0480(2) | 8.3899(2) | 886.86(4)            | 96986                 | 4071                        | 0.939                                  | 8.73             | 2.9          | 3.42  | 8.92   | 1.96                                                 | -2.47                                                | –    |
| 384  |                                                                      |             | 11.0491(2) | 8.3882(2) | 886.86(4)            | 96953                 | 4067                        | 0.938                                  | 9.09             | 3.05         | 3.54  | 9.10   | 1.99                                                 | -2.63                                                | –    |
| 388  |                                                                      |             | 11.0623(2) | 8.3923(2) | 889.41(4)            | 97462                 | 4083                        | 0.938                                  | 8.59             | 2.39         | 4.10  | 10.74  | 2.06                                                 | -2.82                                                | –    |
| 390  |                                                                      |             | 11.0524(2) | 8.3904(2) | 887.62(4)            | 97014                 | 4071                        | 0.938                                  | 8.88             | 2.99         | 3.56  | 9.42   | 2.18                                                 | -2.51                                                | –    |
| 392  |                                                                      |             | 11.0510(2) | 8.3892(2) | 887.27(4)            | 96964                 | 4072                        | 0.939                                  | 8.91             | 2.97         | 3.55  | 9.59   | 2.12                                                 | -2.45                                                | –    |
| 396  |                                                                      |             | 11.0514(2) | 8.3900(2) | 887.42(4)            | 96919                 | 4071                        | 0.939                                  | 8.97             | 3.04         | 3.61  | 9.77   | 2.21                                                 | -2.84                                                | –    |
| 400  |                                                                      |             | 11.0645(2) | 8.3944(2) | 889.99(4)            | 97165                 | 4082                        | 0.938                                  | 8.91             | 3.00         | 3.67  | 10.29  | 2.43                                                 | -2.65                                                | –    |

**Table S1** (continued).

| T, K | Formula                                                             | Space Group | $a$ , Å     | $c$ , Å     | $b$ , Å     | $\beta$ , Å | $V$ , Å <sup>3</sup> | Reflections collected | Unique reflections in total | $\sin\theta/\lambda$ , Å <sup>-1</sup> | $R_{\text{int}}$ | $R_{\sigma}$ | $R_1$ | $wR_2$ | $\rho_{\text{max}}$ , e <sup>-</sup> Å <sup>-3</sup> | $\rho_{\text{min}}$ , e <sup>-</sup> Å <sup>-3</sup> | CCDC    |
|------|---------------------------------------------------------------------|-------------|-------------|-------------|-------------|-------------|----------------------|-----------------------|-----------------------------|----------------------------------------|------------------|--------------|-------|--------|------------------------------------------------------|------------------------------------------------------|---------|
| 100  | (CsD)Cu <sub>5</sub> O <sub>2</sub> (PO <sub>4</sub> ) <sub>2</sub> | $C2/c$      | 10.9371(8)  | 6.3463(5)   | 16.2846(13) | 92.425(6)   | 1129.31(15)          | 4059                  | 4059                        | 0.817                                  | <i>N/A</i>       | 3.02         | 4.16  | 10.72  | 2.26                                                 | -1.27                                                | 2450885 |
| 296  |                                                                     | $P3_1$      | 6.26222(15) | 6.26222(15) | 8.2422(2)   | –           | 279.918(15)          | 10746                 | 510                         | 0.817                                  | 1.97             | 0.69         | 0.97  | 2.44   | 0.42                                                 | -0.48                                                | 2450886 |

**Table S2.** The principal coefficients of the thermal expansion/contraction upon cooling.

| T, K                    | $\alpha_{11}, 10^6 \cdot \text{K}^{-1}$ | $\alpha_{33}, 10^6 \cdot \text{K}^{-1}$ | $\alpha_v, 10^6 \cdot \text{K}^{-1}$ |
|-------------------------|-----------------------------------------|-----------------------------------------|--------------------------------------|
| <b>CsBr<sup>†</sup></b> |                                         |                                         |                                      |
| 100                     | 1(2)                                    | -1.2(3)                                 | 1(5)                                 |
| 200                     | -2.8(8)                                 | -1.2(3)                                 | -7(2)                                |
| 300                     | -6.6(5)                                 | -1.2(3)                                 | -14(1)                               |
| 400                     | -10(1)                                  | -1.2(3)                                 | -22(4)                               |
| <b>CsI<sup>†</sup></b>  |                                         |                                         |                                      |
| 100                     | -2.7(8)                                 | 0.4(1)                                  | -5(2)                                |
| 200                     | -5.2(3)                                 | -1.6(4)                                 | -12.0(8)                             |
| 300                     | -7.7(3)                                 | -3.6(4)                                 | -19.1(7)                             |
| 400                     | -10.3(8)                                | -6(1)                                   | -26(2)                               |
| <b>RbBr</b>             |                                         |                                         |                                      |
| 100                     | -3.9(8)                                 | 5.0(9)                                  | -3(2)                                |
| 200                     | -5.3(8)                                 | 3.2(3)                                  | -7.4(5)                              |
| 300                     | -7(2)                                   | 1.3(8)                                  | -12(2)                               |
| 400                     | -8.1(3)                                 | -1(2)                                   | -17(3)                               |
| <b>RbI<sup>‡</sup></b>  |                                         |                                         |                                      |
| 100                     | -11.1(2)                                | 3(2)                                    | -19.5(9)                             |
| 200                     | -11.0(2)                                | 1.0(5)                                  | -19.5(9)                             |
| 300                     | -11.0(2)                                | -1(2)                                   | -22.7(9)                             |
| 400                     | -11.0(2)                                | -2(3)                                   | -24.2(9)                             |
| <b>KI</b>               |                                         |                                         |                                      |
| 100                     | -10.0(7)                                | 4.7(6)                                  | -15(1)                               |
| 200                     | -12.0(3)                                | 2.8(2)                                  | -21.1(4)                             |
| 300                     | -14(1)                                  | 1.0(4)                                  | -26.8(9)                             |
| 400                     | -16(2)                                  | -0.9(8)                                 | -33(2)                               |

<sup>†</sup> The principal coefficients were calculated for the  $P\bar{3}m1$  structure only.

<sup>‡</sup> The principal coefficients were calculated for the  $P31m$  structure only.

**Table S3.** Selected refinement parameters and the Hamilton  $F$ -statistic values calculated for  $P\bar{3}$  and  $P31m$  structural models.

| $T$ , K     | Total unique reflections | Number of parameters |            | $R_1$ for all observed reflections |            | $R_1$ for reflection with $[F^2 > 2\sigma(F^2)]$ |            | $F$        |                        | $F_{b,n-m,a}^\dagger$ |
|-------------|--------------------------|----------------------|------------|------------------------------------|------------|--------------------------------------------------|------------|------------|------------------------|-----------------------|
|             |                          | $P31m$               | $P\bar{3}$ | $P31m$                             | $P\bar{3}$ | $P31m$                                           | $P\bar{3}$ | For $R_1$  | For $R_1$              |                       |
|             |                          |                      |            |                                    |            |                                                  |            | (all data) | $[F^2 > 2\sigma(F^2)]$ |                       |
| <b>CsBr</b> |                          |                      |            |                                    |            |                                                  |            |            |                        |                       |
| 100         | 4071                     | 117                  | 107        | 0.0443                             | 0.0457     | 0.0320                                           | 0.0306     | 25.39      | -33.84                 | 1.83                  |
| 102         | 4071                     | 121                  | 107        | 0.0440                             | 0.0455     | 0.0315                                           | 0.0303     | 19.56      | -21.09                 | 1.69                  |
| 104         | 4070                     | 121                  | 107        | 0.0431                             | 0.0446     | 0.0314                                           | 0.0303     | 19.98      | -19.42                 | 1.69                  |
| 106         | 4074                     | 117                  | 107        | 0.0423                             | 0.0437     | 0.0313                                           | 0.0298     | 26.63      | -37.02                 | 1.83                  |
| 108         | 4072                     | 113                  | 107        | 0.0420                             | 0.0438     | 0.0309                                           | 0.0296     | 57.77      | -54.35                 | 2.10                  |
| 110         | 4073                     | 121                  | 107        | 0.0430                             | 0.0446     | 0.0317                                           | 0.0301     | 21.40      | -27.78                 | 1.69                  |
| 112         | 4072                     | 117                  | 107        | 0.0423                             | 0.0450     | 0.0309                                           | 0.0312     | 52.10      | 7.72                   | 1.83                  |
| 114         | 4071                     | 121                  | 107        | 0.0435                             | 0.0462     | 0.0311                                           | 0.0307     | 36.11      | -7.21                  | 1.69                  |
| 116         | 4071                     | 121                  | 107        | 0.0438                             | 0.0474     | 0.0304                                           | 0.0307     | 48.29      | 5.60                   | 1.69                  |
| 118         | 4072                     | 121                  | 107        | 0.0445                             | 0.0478     | 0.0310                                           | 0.0307     | 43.41      | -5.44                  | 1.69                  |
| 120         | 4069                     | 121                  | 101        | 0.0455                             | 0.0498     | 0.0307                                           | 0.0311     | 39.07      | 5.18                   | 1.57                  |
| <b>CsI</b>  |                          |                      |            |                                    |            |                                                  |            |            |                        |                       |
| 100         | 4106                     | 115                  | 102        | 0.0299                             | 0.0286     | 0.0237                                           | 0.0222     | -26.12     | -37.63                 | 1.72                  |
| 102         | 4104                     | 115                  | 102        | 0.0305                             | 0.0290     | 0.0243                                           | 0.0227     | -29.44     | -39.08                 | 1.72                  |
| 104         | 4106                     | 115                  | 102        | 0.0315                             | 0.0294     | 0.0248                                           | 0.0229     | -39.57     | -45.24                 | 1.72                  |
| 106         | 4104                     | 105                  | 102        | 0.0313                             | 0.0298     | 0.0245                                           | 0.0226     | -124.70    | -198.73                | 2.61                  |
| 108         | 4106                     | 111                  | 102        | 0.0314                             | 0.0297     | 0.0245                                           | 0.0226     | -46.76     | -66.18                 | 1.88                  |
| 110         | 4106                     | 101                  | 102        | 0.0324                             | 0.0308     | 0.0245                                           | 0.0227     | <i>N/A</i> | <i>N/A</i>             | <i>N/A</i>            |
| 112         | 4107                     | 105                  | 102        | 0.0332                             | 0.0311     | 0.0247                                           | 0.0230     | -163.42    | -177.31                | 2.61                  |
| 114         | 4106                     | 115                  | 102        | 0.0329                             | 0.0305     | 0.0244                                           | 0.0220     | -43.16     | -57.42                 | 1.72                  |
| 116         | 4109                     | 105                  | 102        | 0.0328                             | 0.0328     | 0.0238                                           | 0.0231     | 0.00       | -77.36                 | 2.61                  |
| 118         | 4109                     | 111                  | 102        | 0.0352                             | 0.0342     | 0.0247                                           | 0.0234     | -24.88     | -45.53                 | 1.88                  |
| 120         | 4108                     | 115                  | 102        | 0.0338                             | 0.0341     | 0.0229                                           | 0.0230     | 5.48       | 2.69                   | 1.72                  |
| 122         | 4108                     | 107                  | 96         | 0.0364                             | 0.0366     | 0.0239                                           | 0.0231     | 4.01       | -23.94                 | 1.79                  |
| 124         | 4107                     | 105                  | 96         | 0.0398                             | 0.0403     | 0.0248                                           | 0.0241     | 11.24      | -24.75                 | 1.88                  |

**Table S3 (continued).**

| <i>T</i> , K | Total unique reflections | Number of parameters |            | $R_1$ for all observed reflections |            | $R_1$ for reflection with $[F^2 > 2\sigma(F^2)]$ |            | $F$                  |                                | $F_{b,n-m,\alpha}^\dagger$ |
|--------------|--------------------------|----------------------|------------|------------------------------------|------------|--------------------------------------------------|------------|----------------------|--------------------------------|----------------------------|
|              |                          | $P31m$               | $P\bar{3}$ | $P31m$                             | $P\bar{3}$ | $P31m$                                           | $P\bar{3}$ | For $R_1$ (all data) | For $R_1 [F^2 > 2\sigma(F^2)]$ |                            |
| <b>RbI</b>   |                          |                      |            |                                    |            |                                                  |            |                      |                                |                            |
| 100          | 4095                     | 120                  | 103        | 0.0257                             | 0.0764     | 0.0320                                           | 0.0306     | 1832.54              | 2005.13                        | 1.63                       |
| 120          | 4098                     | 120                  | 103        | 0.0272                             | 0.0650     | 0.0315                                           | 0.0303     | 1102.30              | 1213.91                        | 1.63                       |
| 140          | 4099                     | 122                  | 103        | 0.0290                             | 0.0565     | 0.0314                                           | 0.0303     | 585.20               | 661.63                         | 1.59                       |
| 160          | 4102                     | 122                  | 112        | 0.0314                             | 0.0503     | 0.0313                                           | 0.0298     | 623.31               | 687.77                         | 1.83                       |
| 180          | 4103                     | 120                  | 112        | 0.0330                             | 0.0443     | 0.0309                                           | 0.0296     | 399.35               | 441.54                         | 1.94                       |
| 200          | 4105                     | 122                  | 112        | 0.0336                             | 0.0405     | 0.0317                                           | 0.0301     | 180.38               | 167.00                         | 1.83                       |
| 220          | 4105                     | 135                  | 112        | 0.0353                             | 0.0392     | 0.0309                                           | 0.0312     | 40.24                | 27.06                          | 1.53                       |
| 240          | 4110                     | 135                  | 112        | 0.0373                             | 0.0393     | 0.0311                                           | 0.0307     | 19.03                | 10.01                          | 1.53                       |
| 260          | 4115                     | 135                  | 112        | 0.0391                             | 0.0397     | 0.0304                                           | 0.0307     | 5.35                 | -1.22                          | 1.53                       |
| 280          | 4118                     | 131                  | 116        | 0.0433                             | 0.0426     | 0.0310                                           | 0.0307     | -8.52                | -30.44                         | 1.67                       |
| 300          | 4119                     | 131                  | 116        | 0.0477                             | 0.0469     | 0.0307                                           | 0.0311     | -8.84                | -36.62                         | 1.67                       |
| 310          | 4122                     | 131                  | 113        | 0.0490                             | 0.0497     | 0.0237                                           | 0.0222     | 6.38                 | -15.55                         | 1.61                       |
| 320          | 4122                     | 131                  | 113        | 0.0509                             | 0.0516     | 0.0243                                           | 0.0227     | 6.14                 | -14.44                         | 1.61                       |
| 330          | 4124                     | 121                  | 113        | 0.0560                             | 0.0574     | 0.0248                                           | 0.0229     | 25.33                | -39.74                         | 1.94                       |
| 340          | 4121                     | 115                  | 113        | 0.0610                             | 0.0607     | 0.0245                                           | 0.0226     | -19.65               | -323.04                        | 3.00                       |
| 350          | 4128                     | 117                  | 113        | 0.0640                             | 0.0656     | 0.0245                                           | 0.0226     | 50.76                | -133.04                        | 2.37                       |
| 360          | 4127                     | 117                  | 113        | 0.0692                             | 0.0721     | 0.0245                                           | 0.0227     | 85.78                | -104.69                        | 2.37                       |
| 364          | 4127                     | 117                  | 113        | 0.0739                             | 0.0764     | 0.0247                                           | 0.0230     | 68.97                | -137.46                        | 2.37                       |
| 368          | 4125                     | 117                  | 113        | 0.0776                             | 0.0816     | 0.0244                                           | 0.0220     | 105.96               | -186.67                        | 2.37                       |
| 370          | 4123                     | 117                  | 113        | 0.0809                             | 0.0843     | 0.0238                                           | 0.0231     | 85.94                | -153.32                        | 2.37                       |
| 372          | 4124                     | 117                  | 113        | 0.0827                             | 0.0869     | 0.0247                                           | 0.0234     | 104.33               | -115.36                        | 2.37                       |
| 374          | 4126                     | 117                  | 113        | 0.0878                             | 0.0917     | 0.0229                                           | 0.0230     | 91.01                | -196.89                        | 2.37                       |
| 376          | 4123                     | 125                  | 113        | 0.0881                             | 0.0962     | 0.0239                                           | 0.0231     | 64.08                | -16.26                         | 1.75                       |

**Table S3** (continued).

| T, K        | Total unique reflections | Number of parameters |            | $R_1$ for all observed reflections |            | $R_1$ for reflection with [ $F^2 > 2\sigma(F^2)$ ] |            | F          |                          | $F_{b,n-m,\alpha}^\dagger$ |
|-------------|--------------------------|----------------------|------------|------------------------------------|------------|----------------------------------------------------|------------|------------|--------------------------|----------------------------|
|             |                          | $P31m$               | $P\bar{3}$ | $P31m$                             | $P\bar{3}$ | $P31m$                                             | $P\bar{3}$ | For $R_1$  | For $R_1$                |                            |
|             |                          |                      |            |                                    |            |                                                    |            | (all data) | [ $F^2 > 2\sigma(F^2)$ ] |                            |
| <b>RbBr</b> |                          |                      |            |                                    |            |                                                    |            |            |                          |                            |
| 100         | 4064                     | 121                  | 102        | 0.0307                             | 0.0344     | 0.0270                                             | 0.0301     | 53.04      | 50.39                    | 1.59                       |
| 120         | 4065                     | 119                  | 102        | 0.0315                             | 0.0343     | 0.0272                                             | 0.0297     | 43.10      | 44.63                    | 1.63                       |
| 140         | 4066                     | 119                  | 102        | 0.0317                             | 0.0340     | 0.0271                                             | 0.0292     | 34.91      | 37.38                    | 1.63                       |
| 160         | 4064                     | 119                  | 102        | 0.0333                             | 0.0343     | 0.0284                                             | 0.0284     | 14.15      | 0.00                     | 1.63                       |
| 180         | 4064                     | 119                  | 102        | 0.0345                             | 0.0354     | 0.0284                                             | 0.0279     | 12.27      | -8.10                    | 1.63                       |
| 200         | 4065                     | 115                  | 108        | 0.0360                             | 0.0344     | 0.0291                                             | 0.0265     | -49.04     | -96.33                   | 2.01                       |
| 220         | 4066                     | 115                  | 108        | 0.0386                             | 0.0348     | 0.0308                                             | 0.0263     | -105.66    | -152.88                  | 2.01                       |
| 240         | 4066                     | 125                  | 108        | 0.0379                             | 0.0365     | 0.0292                                             | 0.0267     | -16.81     | -38.00                   | 1.63                       |
| 260         | 4065                     | 117                  | 108        | 0.0391                             | 0.0389     | 0.0292                                             | 0.0272     | -4.48      | -58.03                   | 1.88                       |
| 280         | 4066                     | 125                  | 108        | 0.0417                             | 0.0415     | 0.0305                                             | 0.0284     | -2.22      | -30.82                   | 1.63                       |
| 300         | 4065                     | 125                  | 108        | 0.0439                             | 0.0442     | 0.0312                                             | 0.0296     | 3.18       | -23.16                   | 1.63                       |
| 320         | 4068                     | 121                  | 107        | 0.0463                             | 0.0490     | 0.0323                                             | 0.0316     | 33.84      | -12.09                   | 1.69                       |
| 340         | 4076                     | 121                  | 107        | 0.0526                             | 0.0545     | 0.0346                                             | 0.0332     | 20.78      | -22.40                   | 1.69                       |
| 360         | 4067                     | 125                  | 107        | 0.0549                             | 0.0572     | 0.0352                                             | 0.0347     | 18.73      | -6.18                    | 1.61                       |
| 380         | 4071                     | 125                  | 116        | 0.0601                             | 0.0607     | 0.0374                                             | 0.0342     | 8.80       | -71.82                   | 1.88                       |
| 384         | 4067                     | 125                  | 116        | 0.0616                             | 0.0647     | 0.0371                                             | 0.0354     | 45.19      | -39.22                   | 1.88                       |
| 388         | 4083                     | 125                  | 116        | 0.0646                             | 0.0661     | 0.0431                                             | 0.0410     | 20.66      | -41.81                   | 1.88                       |
| 390         | 4071                     | 125                  | 116        | 0.0637                             | 0.0654     | 0.0381                                             | 0.0356     | 23.71      | -55.65                   | 1.88                       |
| 392         | 4072                     | 125                  | 116        | 0.0646                             | 0.0650     | 0.0390                                             | 0.0355     | 5.45       | -75.18                   | 1.88                       |
| 396         | 4071                     | 121                  | 116        | 0.0666                             | 0.0695     | 0.0394                                             | 0.0361     | 70.30      | -126.79                  | 2.22                       |
| <b>KI</b>   |                          |                      |            |                                    |            |                                                    |            |            |                          |                            |
| 100         | 4101                     | 130                  | 104        | 0.0257                             | 0.0468     | 0.0245                                             | 0.0449     | 353.74     | 360.23                   | 1.50                       |
| 120         | 4103                     | 130                  | 104        | 0.0265                             | 0.0447     | 0.0252                                             | 0.0427     | 281.97     | 285.92                   | 1.50                       |
| 140         | 4106                     | 130                  | 104        | 0.0270                             | 0.0428     | 0.0254                                             | 0.0405     | 231.34     | 235.87                   | 1.50                       |
| 160         | 4107                     | 130                  | 110        | 0.0277                             | 0.0407     | 0.0257                                             | 0.0380     | 230.44     | 235.89                   | 1.57                       |
| 180         | 4108                     | 130                  | 110        | 0.0289                             | 0.0385     | 0.0265                                             | 0.0355     | 154.09     | 158.04                   | 1.57                       |
| 200         | 4110                     | 136                  | 110        | 0.0276                             | 0.0376     | 0.0248                                             | 0.0339     | 130.82     | 132.75                   | 1.50                       |
| 220         | 4114                     | 136                  | 110        | 0.0291                             | 0.0363     | 0.0256                                             | 0.0319     | 85.08      | 84.57                    | 1.50                       |
| 240         | 4116                     | 136                  | 110        | 0.0305                             | 0.0359     | 0.0262                                             | 0.0308     | 59.00      | 58.47                    | 1.50                       |
| 260         | 4118                     | 134                  | 110        | 0.0318                             | 0.0355     | 0.0274                                             | 0.0303     | 40.88      | 37.00                    | 1.52                       |
| 280         | 4119                     | 136                  | 110        | 0.0335                             | 0.0365     | 0.0278                                             | 0.0302     | 28.67      | 27.59                    | 1.50                       |
| 300         | 4120                     | 130                  | 110        | 0.0346                             | 0.0368     | 0.0284                                             | 0.0300     | 26.18      | 23.11                    | 1.57                       |
| 320         | 4126                     | 126                  | 116        | 0.0369                             | 0.0390     | 0.0291                                             | 0.0305     | 46.82      | 39.41                    | 1.83                       |
| 340         | 4129                     | 126                  | 116        | 0.0392                             | 0.0415     | 0.0309                                             | 0.0318     | 48.35      | 23.66                    | 1.83                       |
| 360         | 4133                     | 130                  | 116        | 0.0415                             | 0.0434     | 0.0320                                             | 0.0323     | 26.78      | 5.39                     | 1.69                       |
| 380         | 4136                     | 126                  | 110        | 0.0441                             | 0.0464     | 0.0333                                             | 0.0347     | 26.82      | 21.52                    | 1.65                       |
| 400         | 4138                     | 130                  | 117        | 0.0476                             | 0.0495     | 0.0350                                             | 0.0355     | 25.10      | 8.87                     | 1.72                       |

<sup>†</sup> The  $F_{b,n-m,\alpha}$  was calculated with the significance level  $\alpha = 0.05$ .

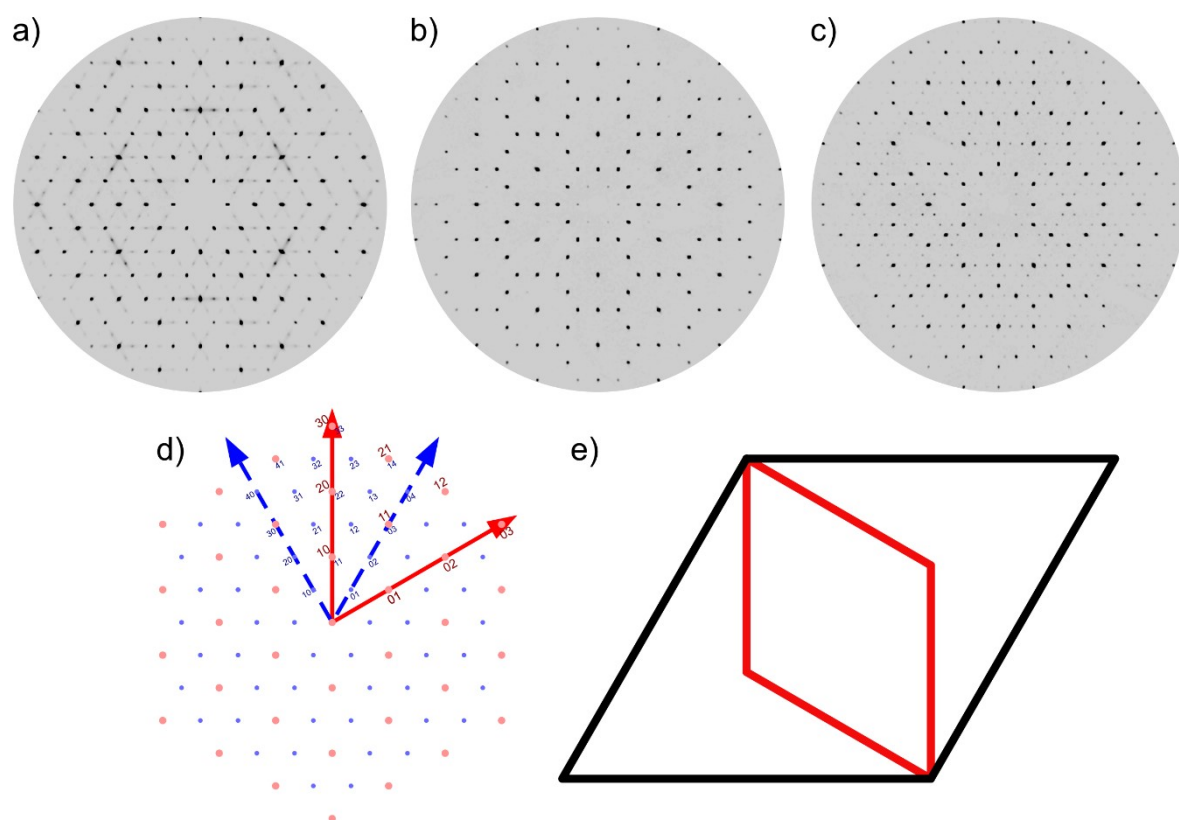

**Figure S1** Fragments of precession images of the  $hk0$  reciprocal lattice plane of (a)  $(\text{CsCl})\text{Cu}_5\text{O}_2(\text{VO}_4)_2$ , (b)  $(\text{CsI})\text{Cu}_5\text{O}_2(\text{VO}_4)_2$  at 140 K and (c) 100 K; (d) schematic image of the superlattice reflections (blue) of  $P31m$  polymorph and reflections (red) from  $P\bar{3}m1$  archetype; (e) relations between unit cells for the  $P31m$  and  $P\bar{3}m1$  polymorphs.

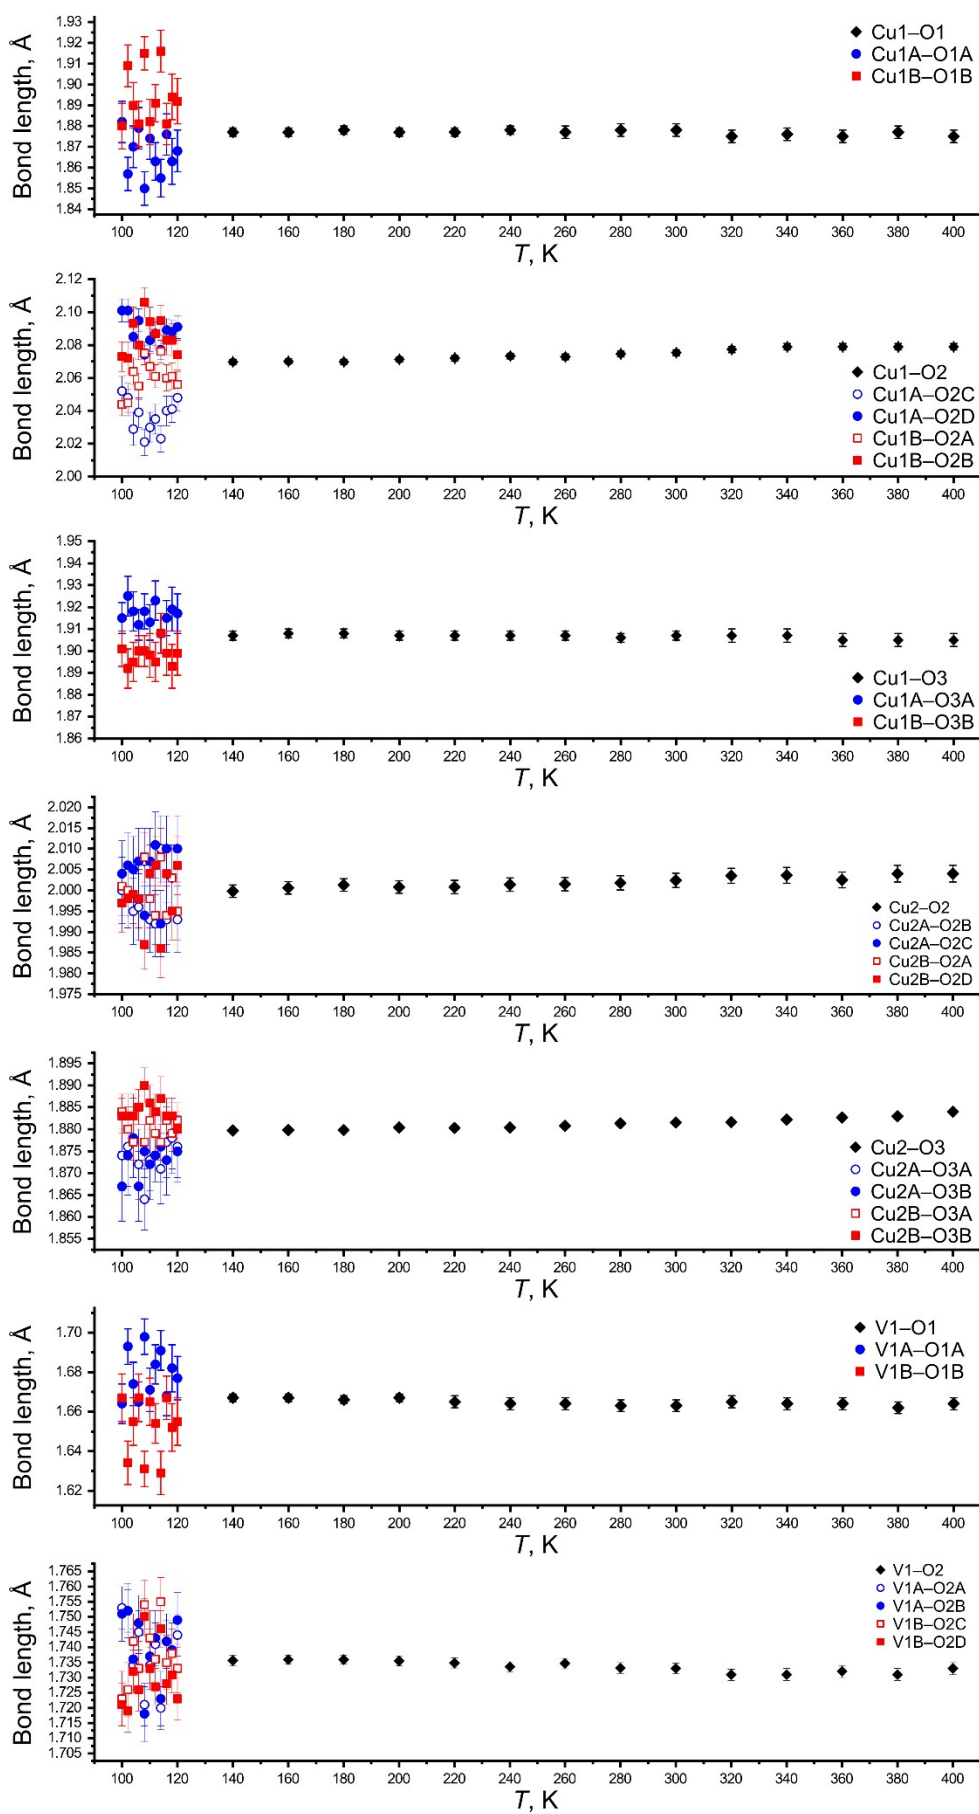

Figure S2 Graphs of selected bond length changing upon cooling in the structure of CsBr.

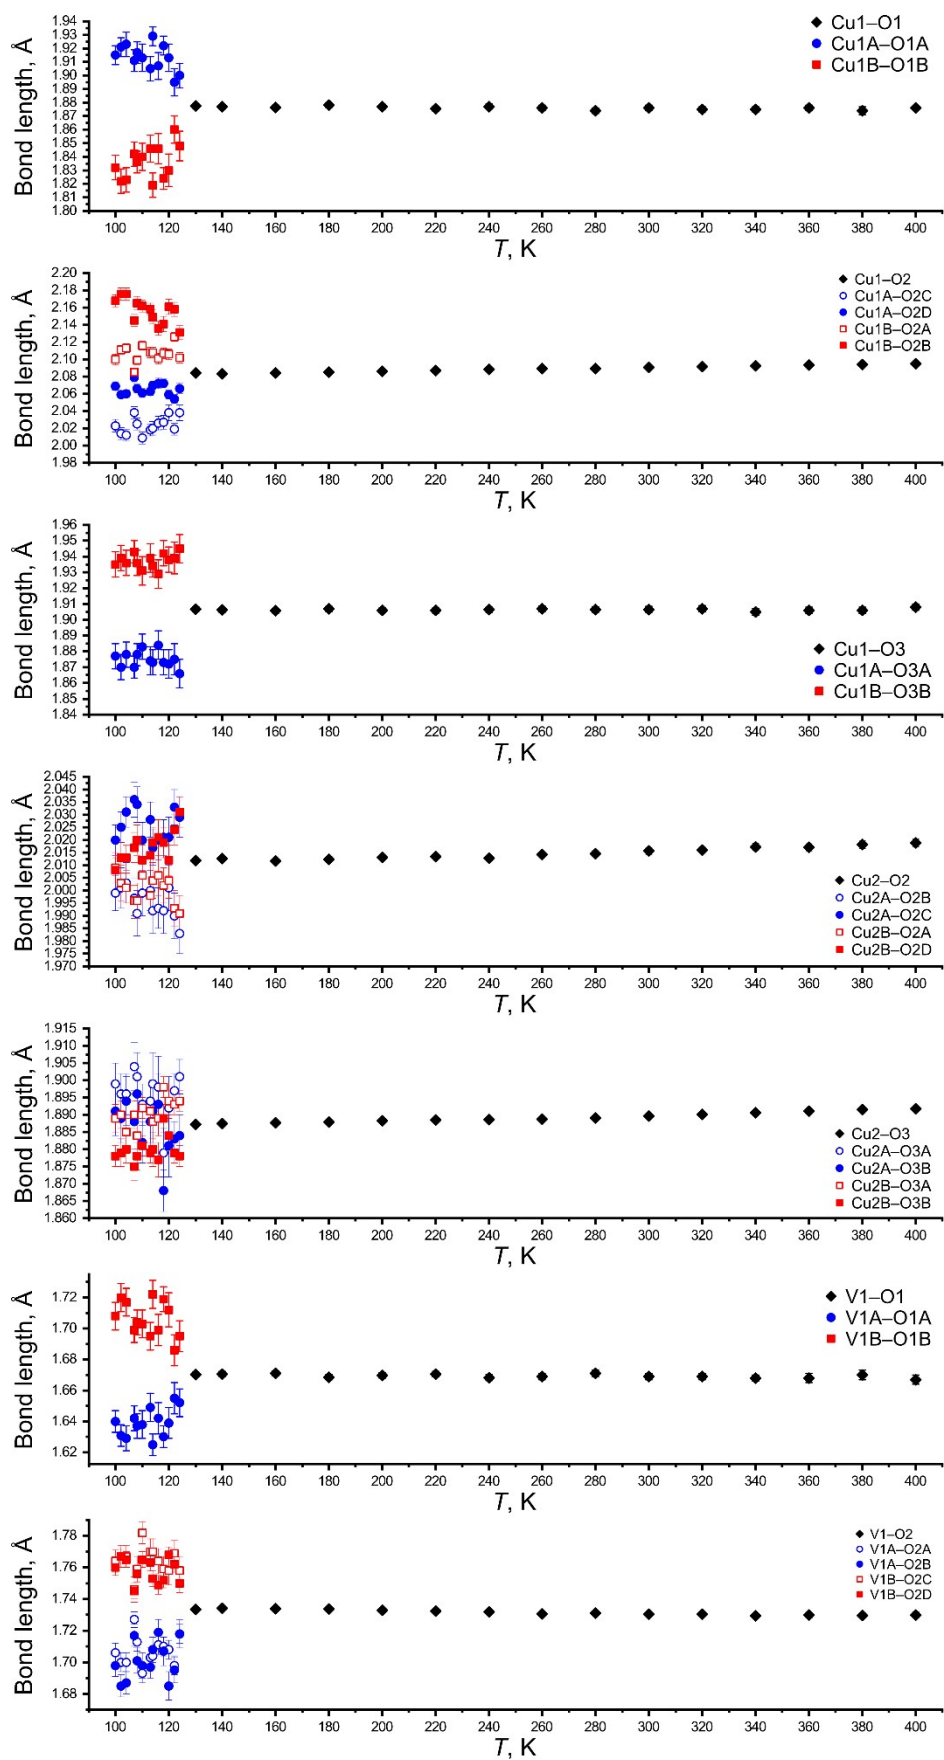

Figure S3 Graphs of selected bond length changing upon cooling in the structure of CsI.

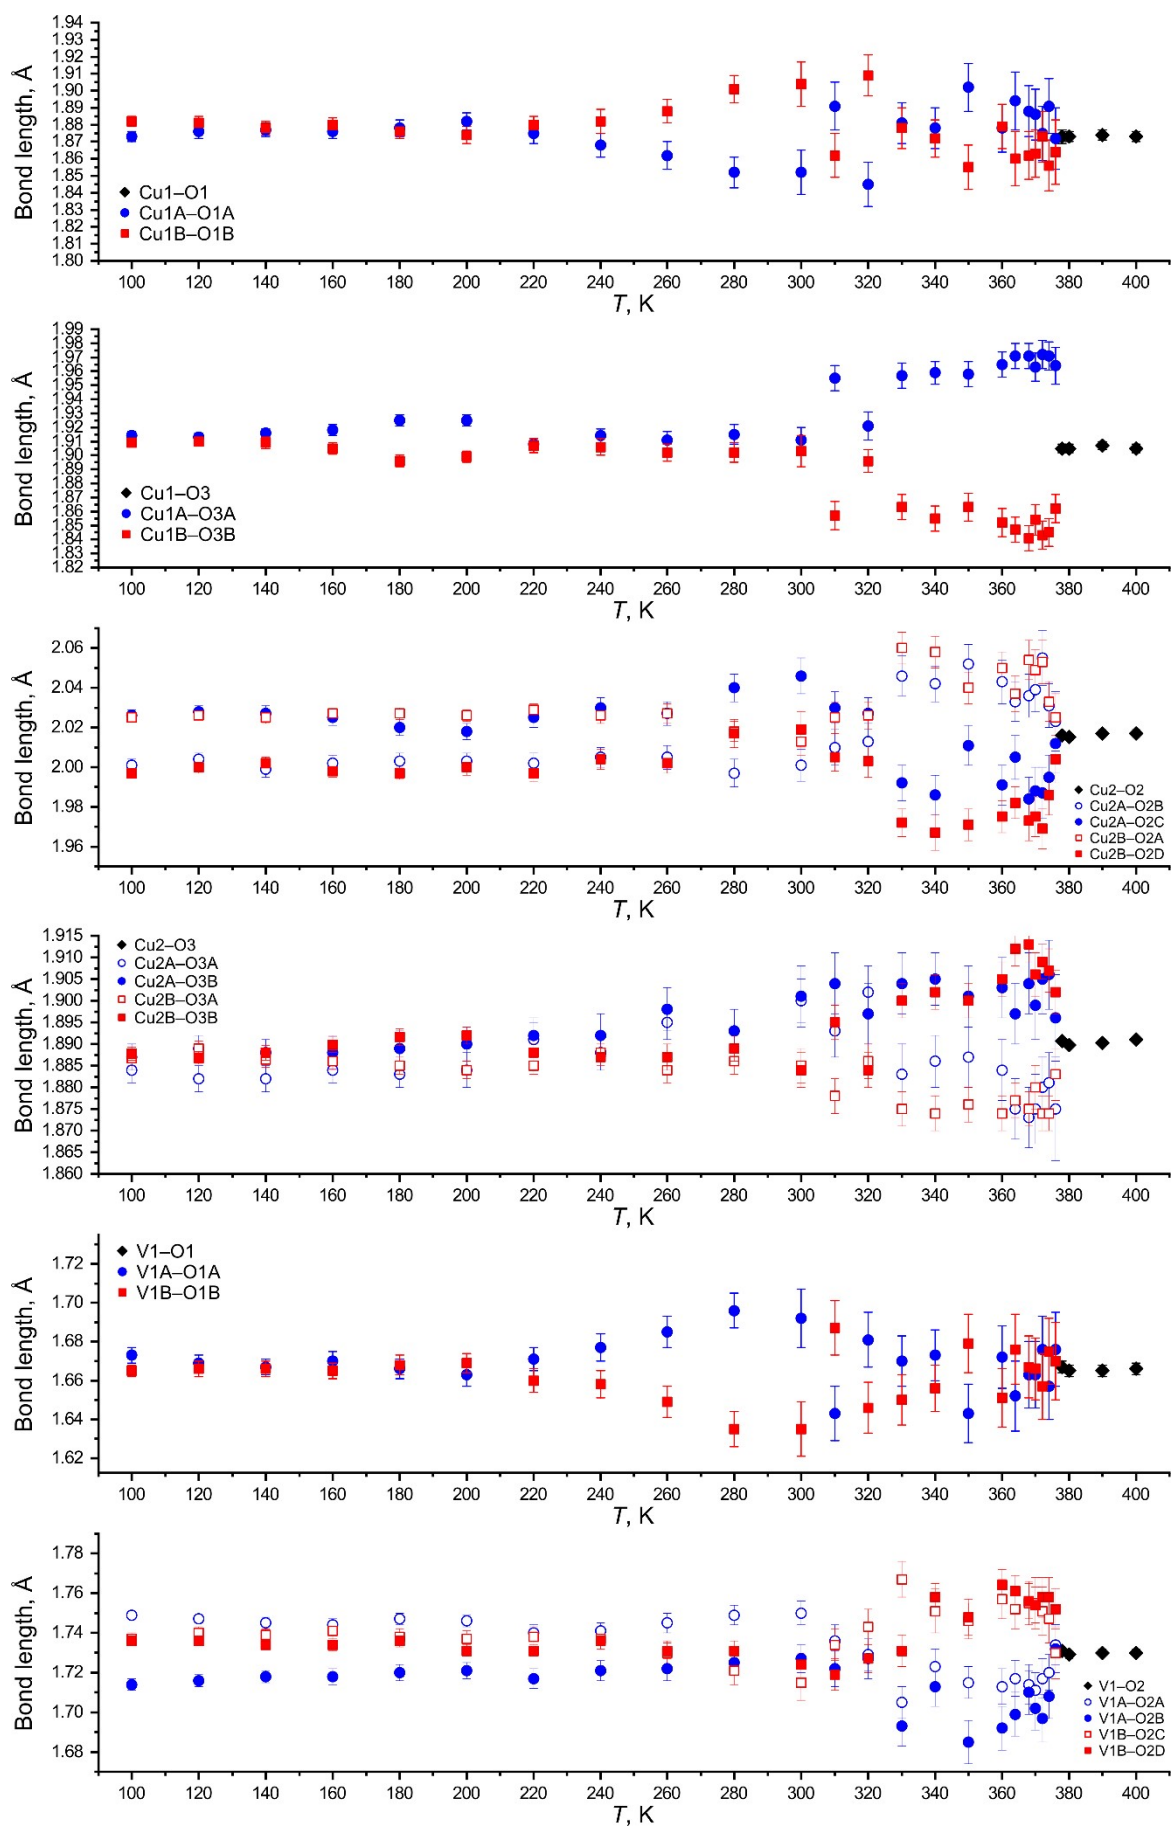

Figure S4 Graphs of selected bond length changing upon cooling in the structure of RbI.

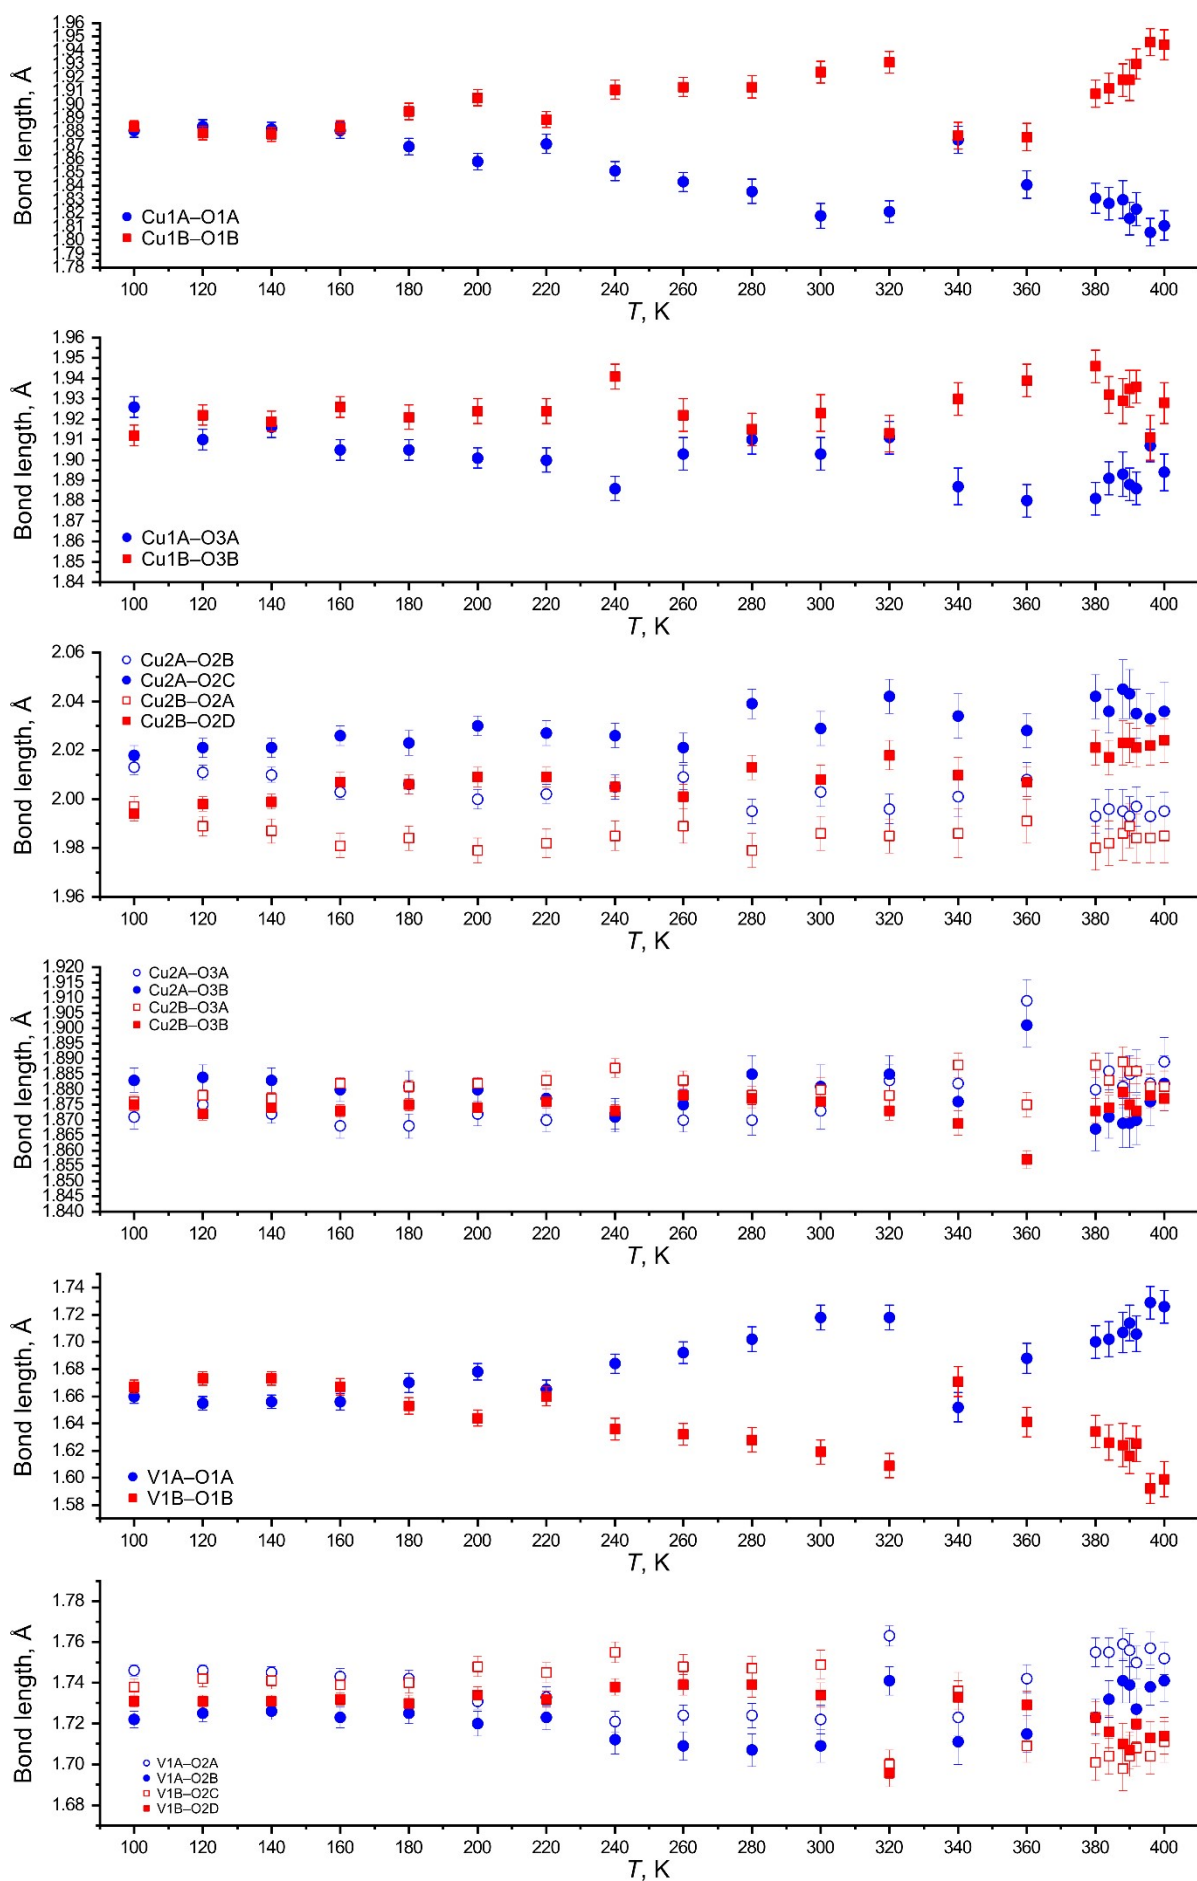

**Figure S5** Graphs of selected bond length changing upon cooling in the structure of RbBr.

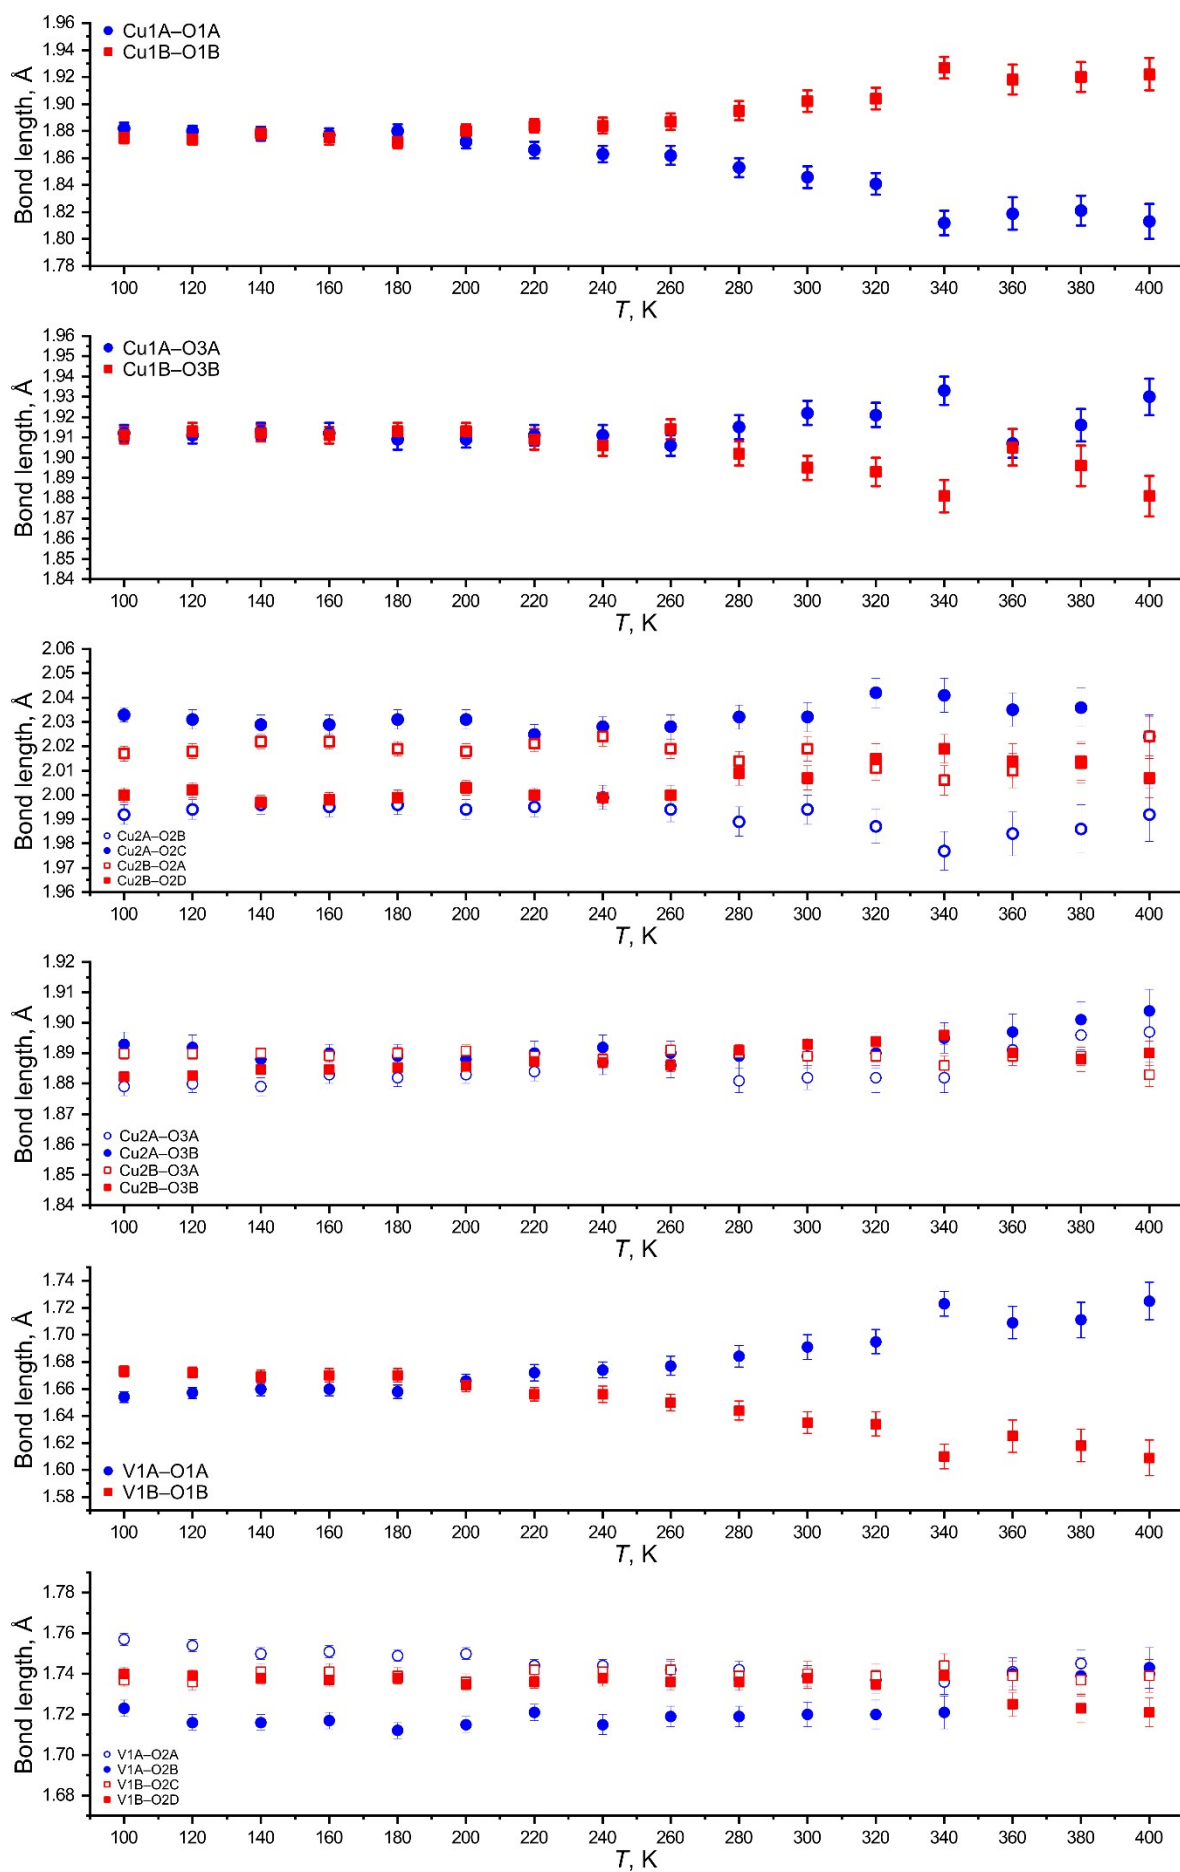

Figure S6 Graphs of selected bond length changing upon cooling in the structure of KI.
