# Supplementary material
Source: Royal Society of Chemistry journal article supplement (doi:10.1039/d5ce00495k)
Supplement: d5ce00495k1.xlsx [file d5ce00495k1.xlsx]

## Sheet: Лист1
VCsBr		VCsI		VRbBr		VRbI		VKI		PCsI
Datablock	CCDC	Datablock	CCDC	Datablock	CCDC	Datablock	CCDC	Datablock	CCDC	Datablock	CCDC
data_vcsbr_140_00	2450896	data_vcsi_100_00	2450921	data_vrbbr_120_00	2451060	data_vrbi_390_00	2451081	data_vki_400_00	2450784	data_PCsI_100K	2450885
data_vcsbr_160_00	2450897	data_vcsi_400_00	2450922	data_vrbbr_390_00	2451061	data_VRbI_400_00	2451082	data_vki_100_00	2450785	data_PCsI_296K	2450886
data_vcsbr_180_00	2450898	data_vcsi_220_00	2450923	data_vrbbr_180_00	2451062	data_VRbI_378_00	2451083	data_vki_120_00	2450786
data_vcsbr_260_00	2450899	data_vcsi_300_00	2450924	data_vrbbr_400_00	2451063	data_vrbi_380_00	2451084	data_vki_140_00	2450787
data_vcsbr_200_00	2450900	data_vcsi_320_00	2450925	data_vrbbr_100_00	2451064	data_vrbi_120_00	2451085	data_vki_160_00	2450788
data_vcsbr_280_00	2450901	data_vcsi_240_00	2450926	data_vrbbr_200_00	2451065	data_vrbi_240_00	2451086	data_vki_180_00	2450789
data_vcsbr_300_00	2450902	data_vcsi_360_00	2450927	data_vrbbr_280_00	2451066	data_vrbi_320_00	2451087	data_vki_200_00	2450790
data_vcsbr_240_00	2450903	data_vcsi_160_00	2450928	data_vrbbr_260_00	2451067	data_vrbi_160_00	2451088	data_vki_220_00	2450791
data_vcsbr_220_00	2450904	data_vcsi_140_00	2450929	data_vrbbr_320_00	2451068	data_vrbi_350_00	2451089	data_vki_240_00	2450792
data_vcsbr_320_00	2450905	data_vcsi_180_00	2450930	data_vrbbr_360_00	2451069	data_vrbi_330_00	2451090	data_vki_260_00	2450793
data_vcsbr_360_00	2450906	data_vcsi_380_00	2450931	data_vrbbr_300_00	2451070	data_vrbi_368_00	2451091	data_vki_280_00	2450794
data_vcsbr_380_00	2450907	data_vcsi_260_00	2450932	data_vrbbr_340_00	2451071	data_vrbi_376_00	2451092	data_vki_300_00	2450795
data_vcsbr_340_00	2450908	data_vcsi_200_00	2450933	data_vrbbr_388_00	2451072	data_vrbi_360_00	2451093	data_vki_320_00	2450796
data_vcsbr_400_00	2450909	data_vcsi_340_00	2450934	data_vrbbr_380_00	2451073	data_vrbi_340_00	2451094	data_vki_340_00	2450797
data_vcsbr_112_00	2450910	data_vcsi_280_00	2450935	data_vrbbr_220_00	2451074	data_vrbi_372_00	2451095	data_vki_360_00	2450798
data_vcsbr_118_00	2450911	data_vcsi_130_00	2450936	data_vrbbr_384_00	2451075	data_vrbi_364_00	2451096	data_vki_380_00	2450799
data_vcsbr_102_00	2450912	data_vcsi_104_00	2450937	data_vrbbr_392_00	2451076	data_vrbi_310_00	2451097
data_vcsbr_100_00	2450913	data_vcsi_122_00	2450938	data_vrbbr_140_00	2451077	data_vrbi_300_00	2451098
data_vcsbr_114_00	2450914	data_vcsi_118_00	2450939	data_vrbbr_160_00	2451078	data_vrbi_180_00	2451099
data_vcsbr_104_00	2450915	data_vcsi_110_00	2450940	data_vrbbr_396_00	2451079	data_vrbi_260_00	2451100
data_vcsbr_116_00	2450916	data_vcsi_116_00	2450941	data_vrbbr_240_00	2451080	data_vrbi_140_00	2451101
data_vcsbr_110_00	2450917	data_vcsi_112_00	2450942			data_vrbi_280_00	2451102
data_vcsbr_106_00	2450918	data_vcsi_124_00	2450943			data_vrbi_220_00	2451103
data_vcsbr_120_00	2450919	data_vcsi_106_00	2450944			data_vrbi_100_00	2451104
data_vcsbr_108_00	2450920	data_vcsi_120_00	2450945			data_vrbi_200_00	2451105
		data_vcsi_114_00	2450946
		data_vcsi_102_00	2450947
		data_vcsi_108_00	2450948									Total
	25		28		21		25		16		2	117
